# Supplementary material for: Waste rubber seeds as a renewable energy source: direct biodiesel production using a controlled crushing device
Source: Royal Society of Chemistry journal article supplement (doi:10.1039/d1ra08298a), 2022-01-01
Supplement: d1ra08298a1.pdf [file d1ra08298a1.pdf]

## Supplementary Information

### **Waste Rubber Seeds as a Renewable Energy Source: Direct Biodiesel Production Using Controlled Crushing Equipment**

Juliati Br. Tarigan,<sup>a</sup> Raini Anggraini,<sup>a</sup> Ryan Pratama Sembiring,<sup>a</sup> Minto Supeno,<sup>a</sup> Kerista Tarigan,<sup>b</sup> Junedi Ginting,<sup>b</sup> Justaman A Karo-karo,<sup>c</sup> and Eko K. Sitepu,<sup>a\*</sup>

<sup>a</sup> Department of Chemistry, Universitas Sumatera Utara, Medan 20155, Indonesia

<sup>b</sup> Department of Physic, Universitas Sumatera Utara, Medan 20155, Indonesia

<sup>c</sup> Balai Riset dan Standarisasi, Kementerian Perindustrian, Medan 20214, Indonesia

\* Correspondence author: [ekositepu@usu.ac.id](mailto:ekositepu@usu.ac.id)

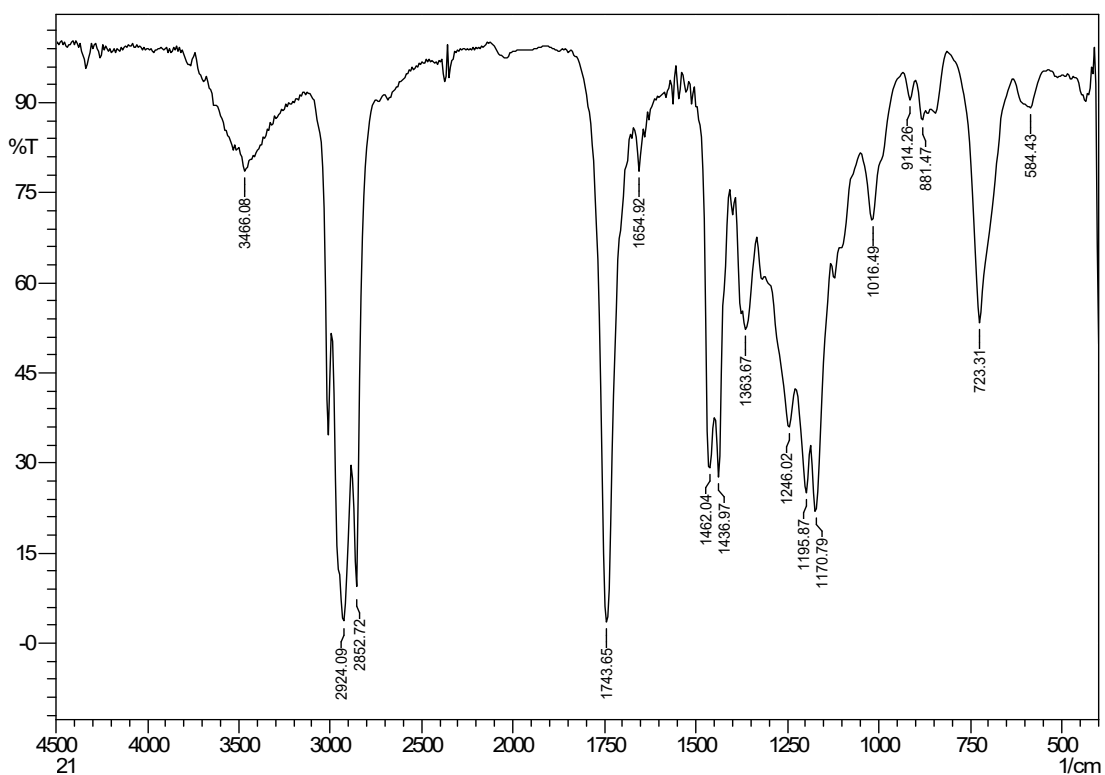

**Figure 1.** The FT-IR spectrum of methyl ester (biodiesel) produces from the CCD-assisted DT rubber seed.

**Table 1.** ANOVA and Tukey post hoc test for biodiesel conversion and FA extraction yields of the CCD-assisted DT rubber seed. Significance values below  $\alpha < 0.05$  are colour coded in red.

Effect of ratio seeds : methanol

| Effect                      | Univariate Tests of Significance for Biodiesel Conversion (%) (Ratio)<br>Sigma-restricted parameterization<br>Effective hypothesis decomposition |                  |          |          |          |
|-----------------------------|--------------------------------------------------------------------------------------------------------------------------------------------------|------------------|----------|----------|----------|
|                             | SS                                                                                                                                               | Degr. of Freedom | MS       | F        | p        |
| Intercept                   | 68919.88                                                                                                                                         | 1                | 68919.88 | 99179.57 | 0.000000 |
| Ratio Seed : Methanol (w/v) | 9048.77                                                                                                                                          | 4                | 2262.19  | 3255.42  | 0.000000 |
| Error                       | 3.47                                                                                                                                             | 5                | 0.69     |          |          |

| Cell No. | Ratio Seed : Methanol (w/v) | Tukey HSD test, variable Biodiesel Conversion (%) (Ratio)<br>Approximate Probabilities for Post Hoc Tests<br>Error: Between MS = .69490, df = 5.0000 |          |          |          |          |
|----------|-----------------------------|------------------------------------------------------------------------------------------------------------------------------------------------------|----------|----------|----------|----------|
|          |                             | {1}                                                                                                                                                  | {2}      | {3}      | {4}      | {5}      |
|          |                             | 22.860                                                                                                                                               | 97.500   | 98.540   | 97.865   | 98.325   |
| 1        | 1:1                         |                                                                                                                                                      | 0.000271 | 0.000271 | 0.000271 | 0.000271 |
| 2        | 1:2                         | 0.000271                                                                                                                                             |          | 0.729912 | 0.990067 | 0.850182 |
| 3        | 1:3                         | 0.000271                                                                                                                                             | 0.729912 |          | 0.917039 | 0.998706 |
| 4        | 1:4                         | 0.000271                                                                                                                                             | 0.990067 | 0.917039 |          | 0.976990 |
| 5        | 1:5                         | 0.000271                                                                                                                                             | 0.850182 | 0.998706 | 0.976990 |          |

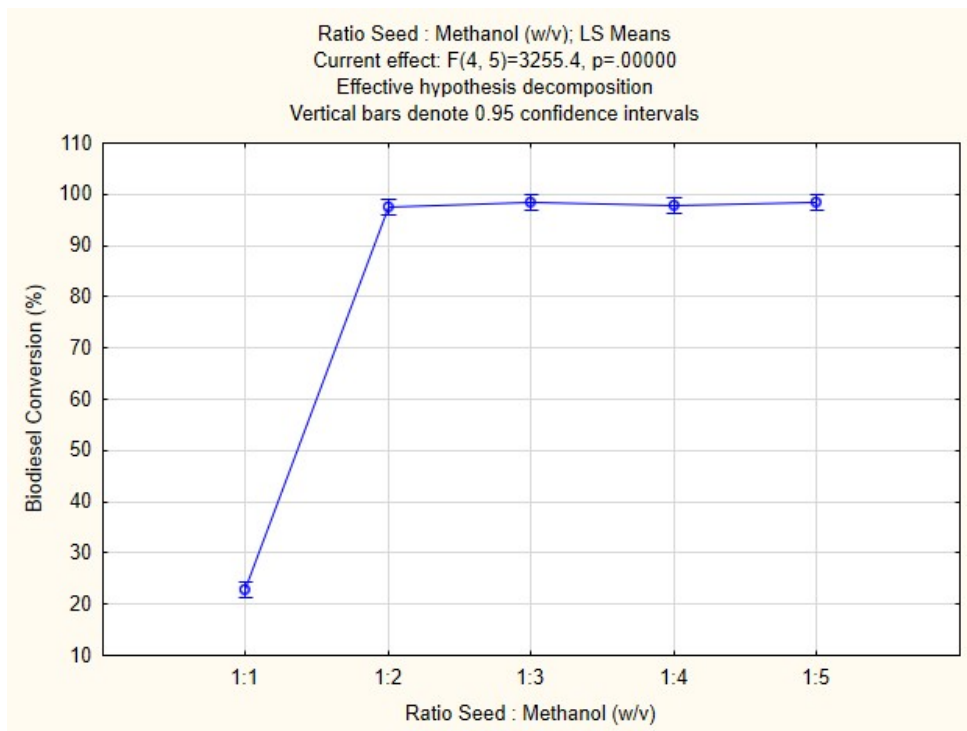

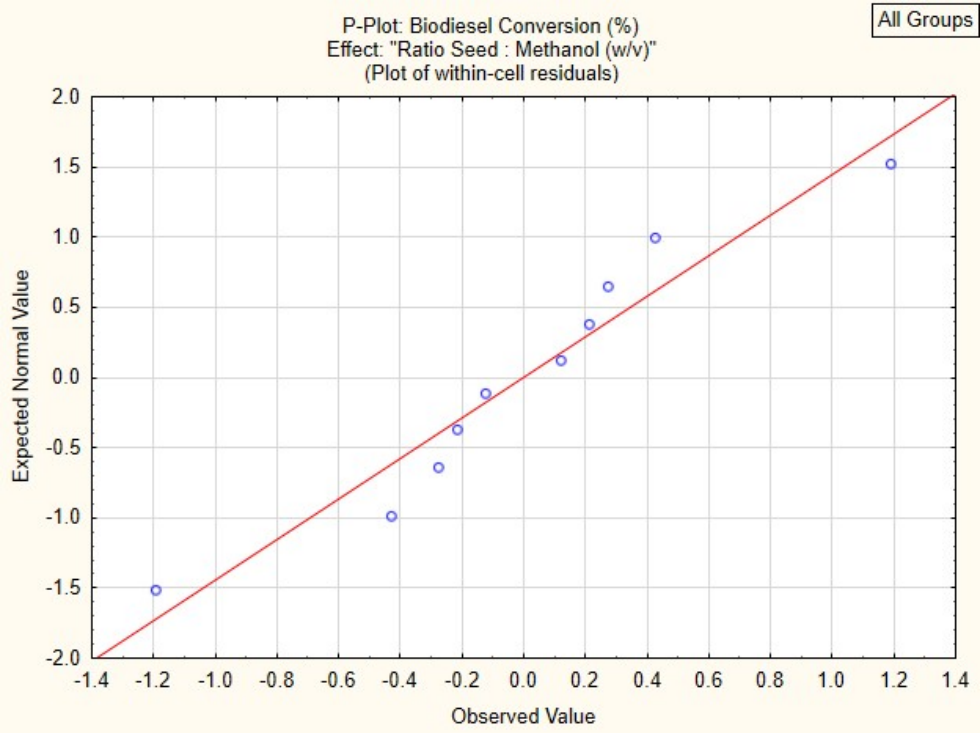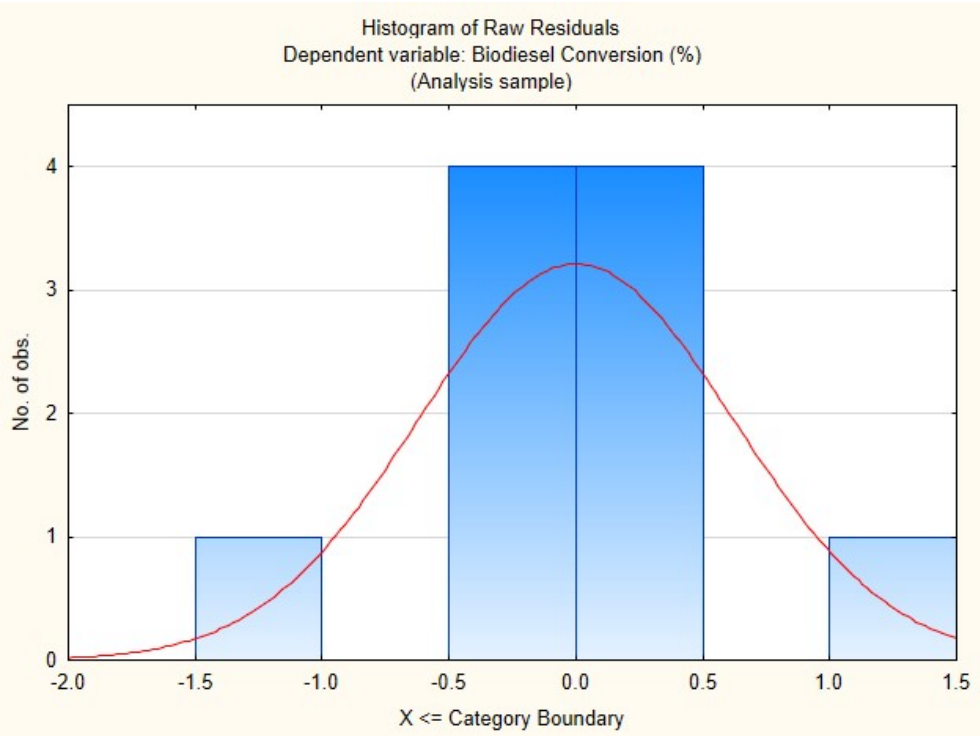

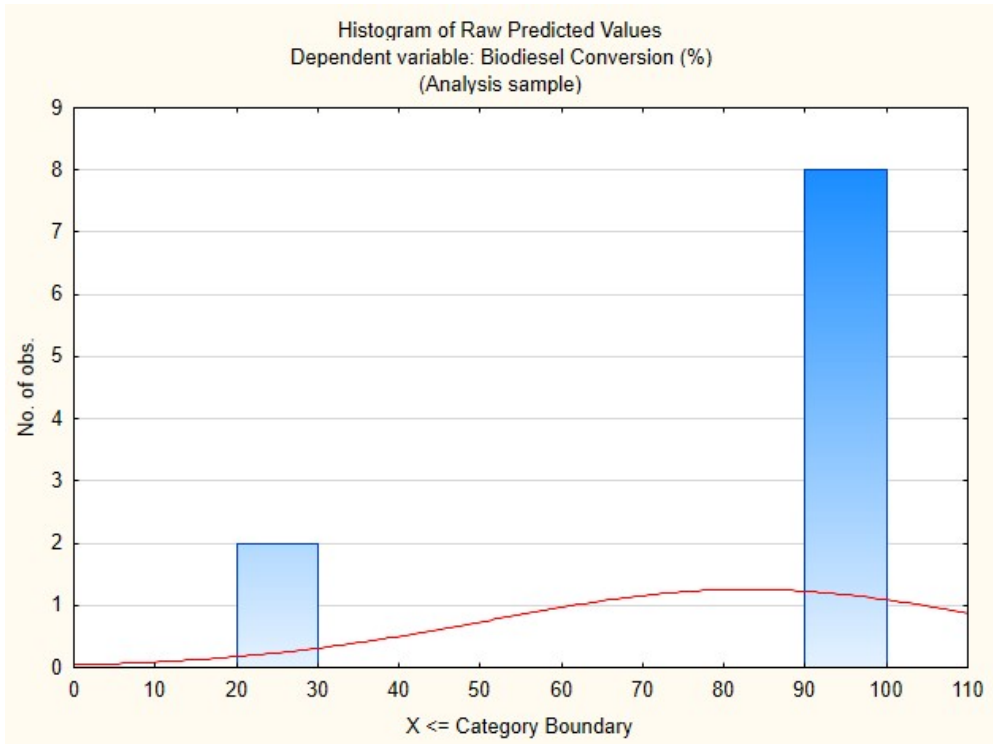

| Univariate Tests of Significance for C16:0 (Ratio) |          |                  |          |          |          |
|----------------------------------------------------|----------|------------------|----------|----------|----------|
| Sigma-restricted parameterization                  |          |                  |          |          |          |
| Effective hypothesis decomposition                 |          |                  |          |          |          |
| Effect                                             | SS       | Degr. of Freedom | MS       | F        | p        |
| Intercept                                          | 788.5440 | 1                | 788.5440 | 9616.390 | 0.000000 |
| Ratio Seed : Methanol (w/v)                        | 0.2460   | 4                | 0.0615   | 0.750    | 0.598331 |
| Error                                              | 0.4100   | 5                | 0.0820   |          |          |

| Tukey HSD test; variable C16:0 (Ratio)       |                             |          |          |          |          |          |
|----------------------------------------------|-----------------------------|----------|----------|----------|----------|----------|
| Approximate Probabilities for Post Hoc Tests |                             |          |          |          |          |          |
| Error: Between MS = .08200, df = 5.0000      |                             |          |          |          |          |          |
| Cell No.                                     | Ratio Seed : Methanol (w/v) | {1}      | {2}      | {3}      | {4}      | {5}      |
| 1                                            | 1:1                         | 8.7000   | 8.8000   | 8.9500   | 9.1500   | 8.8000   |
| 2                                            | 1:2                         | 0.995775 | 0.995775 | 0.895622 | 0.567465 | 0.995775 |
| 3                                            | 1:3                         | 0.895622 | 0.980887 | 0.980887 | 0.742500 | 1.000000 |
| 4                                            | 1:4                         | 0.567465 | 0.742500 | 0.948353 | 0.948353 | 0.980887 |
| 5                                            | 1:5                         | 0.995775 | 1.000000 | 0.980887 | 0.742500 | 0.742500 |

Ratio Seed : Methanol (w/v): LS Means  
Current effect:  $F(4, 5) = .75000$ ,  $p = .59833$   
Effective hypothesis decomposition  
Vertical bars denote 0.95 confidence intervals

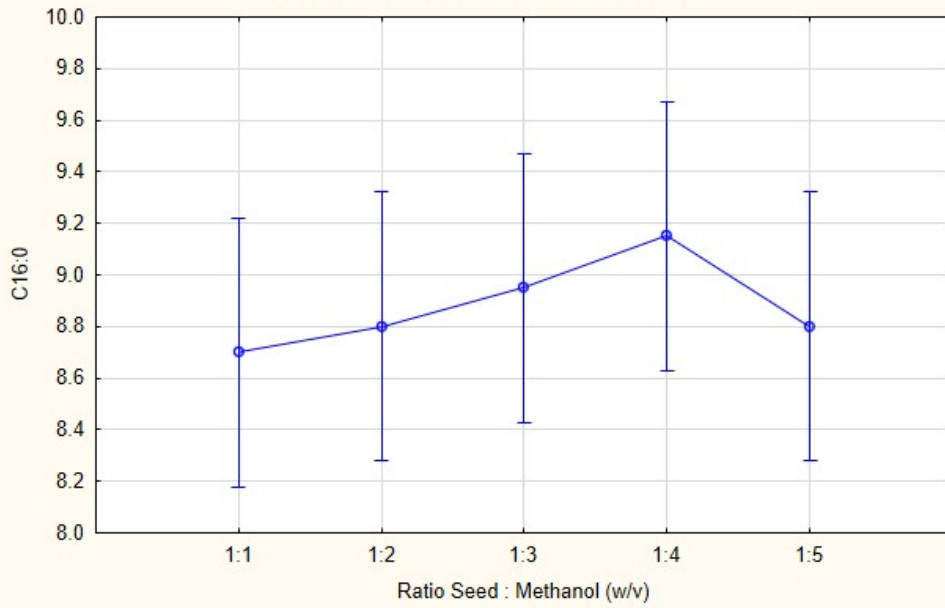

P-Plot: C16:0  
Effect: "Ratio Seed : Methanol (w/v)"  
(Plot of within-cell residuals)

All Groups

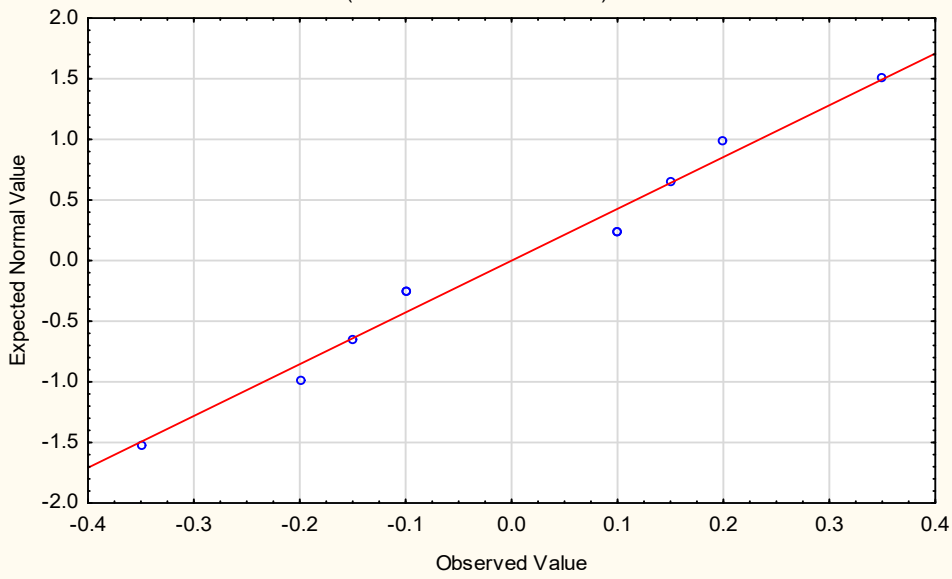

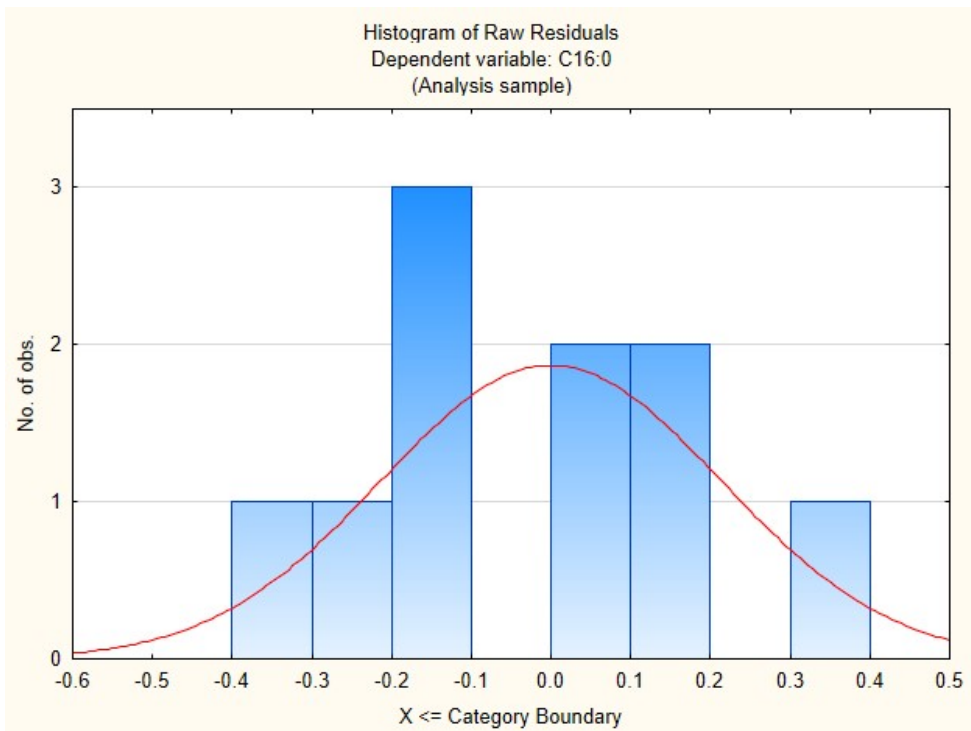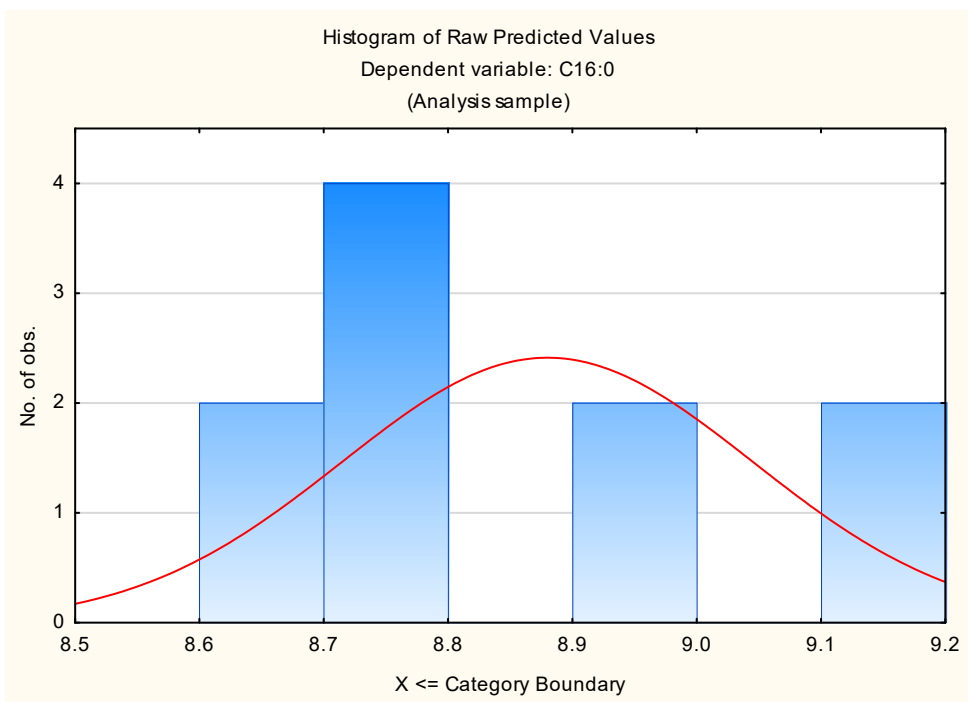

|                             |  | Univariate Tests of Significance for C18:0 (Ratio) |                  |          |          |          |
|-----------------------------|--|----------------------------------------------------|------------------|----------|----------|----------|
|                             |  | Sigma-restricted parameterization                  |                  |          |          |          |
|                             |  | Effective hypothesis decomposition                 |                  |          |          |          |
| Effect                      |  | SS                                                 | Degr. of Freedom | MS       | F        | p        |
| Intercept                   |  | 555.0250                                           | 1                | 555.0250 | 1275.920 | 0.000000 |
| Ratio Seed : Methanol (w/v) |  | 2.8700                                             | 4                | 0.7175   | 1.649    | 0.295601 |
| Error                       |  | 2.1750                                             | 5                | 0.4350   |          |          |

| Tukey HSD test; variable C18:0 (Ratio)       |                             |          |          |          |          |          |
|----------------------------------------------|-----------------------------|----------|----------|----------|----------|----------|
| Approximate Probabilities for Post Hoc Tests |                             |          |          |          |          |          |
| Error: Between MS = .43500, df = 5.0000      |                             |          |          |          |          |          |
| Cell No.                                     | Ratio Seed : Methanol (w/v) | {1}      | {2}      | {3}      | {4}      | {5}      |
|                                              |                             | 6.8000   | 7.3500   | 7.5500   | 8.4000   | 7.1500   |
| 1                                            | 1:1                         |          | 0.909149 | 0.783861 | 0.246091 | 0.979973 |
| 2                                            | 1:2                         | 0.909149 |          | 0.997543 | 0.557486 | 0.997543 |
| 3                                            | 1:3                         | 0.783861 | 0.997543 |          | 0.709284 | 0.967957 |
| 4                                            | 1:4                         | 0.246091 | 0.557486 | 0.709284 |          | 0.421283 |
| 5                                            | 1:5                         | 0.979973 | 0.997543 | 0.967957 | 0.421283 |          |

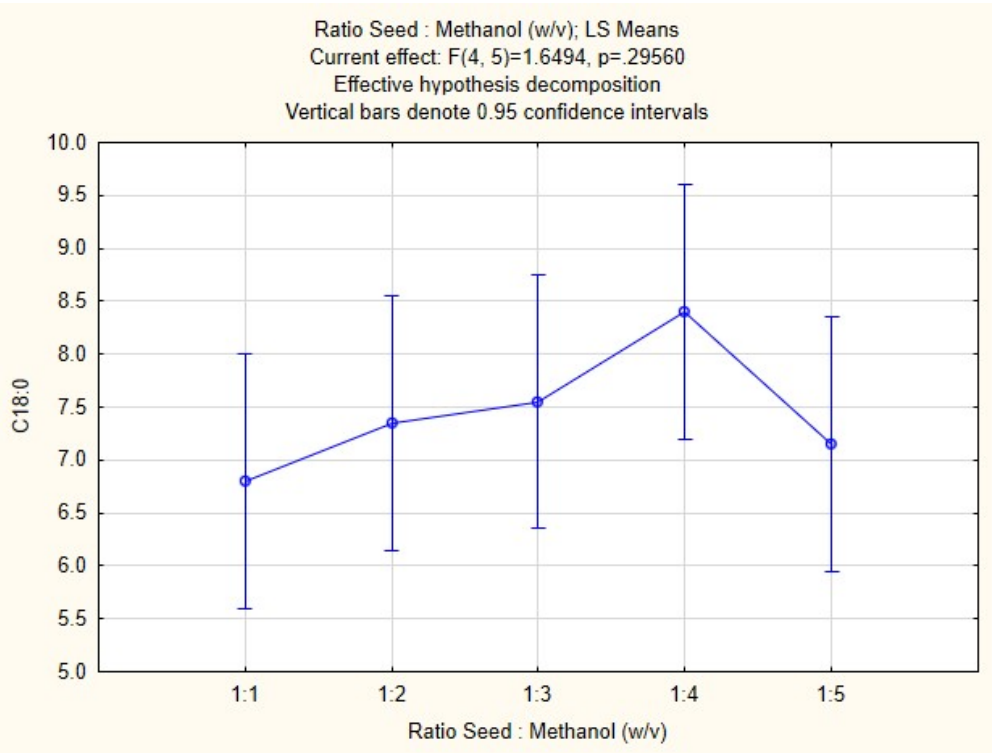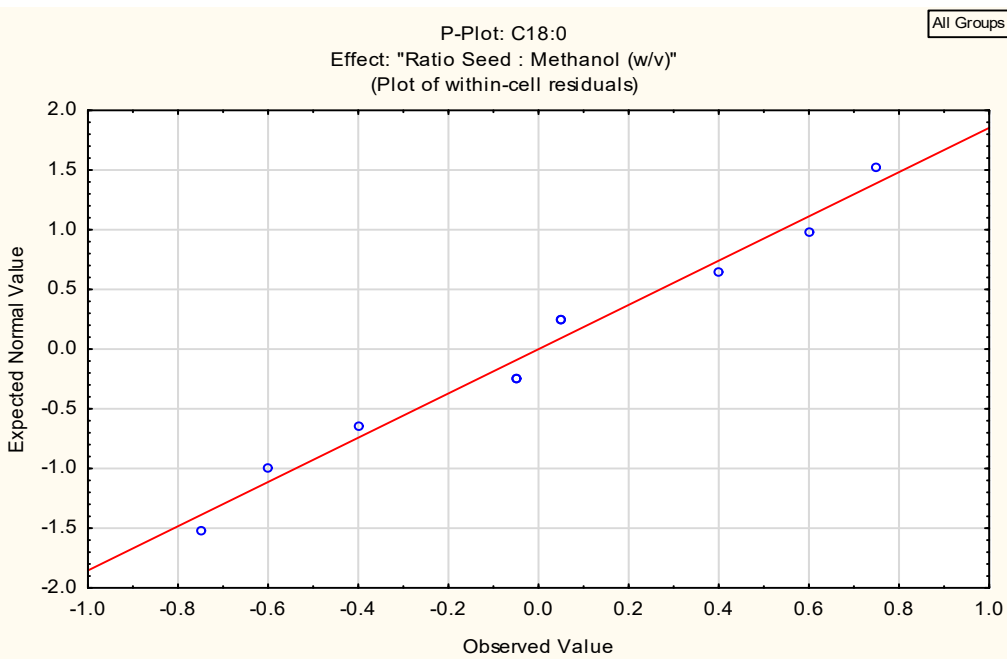

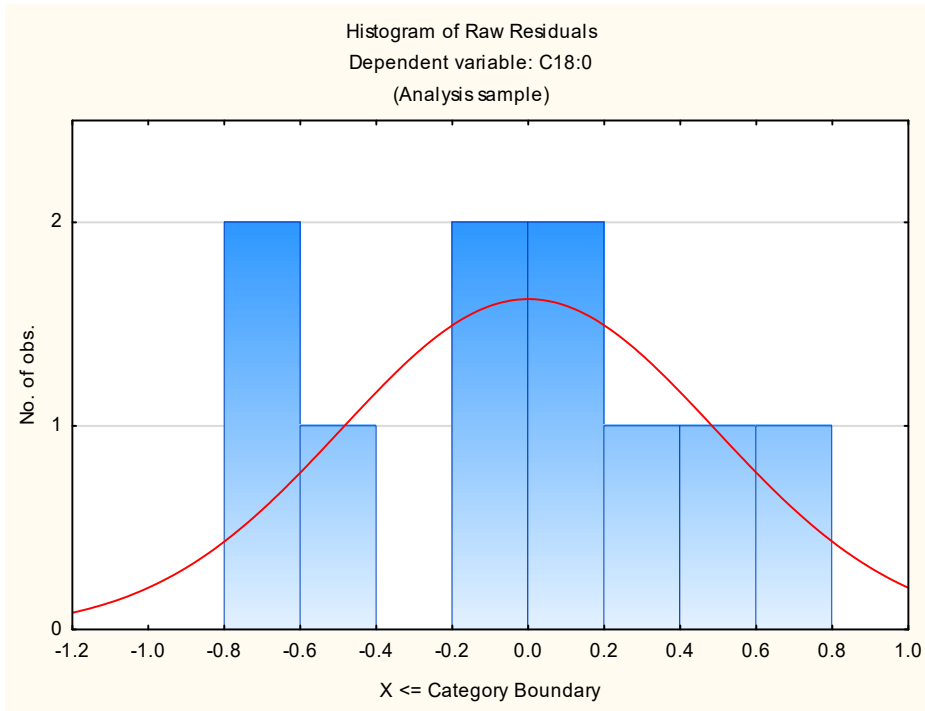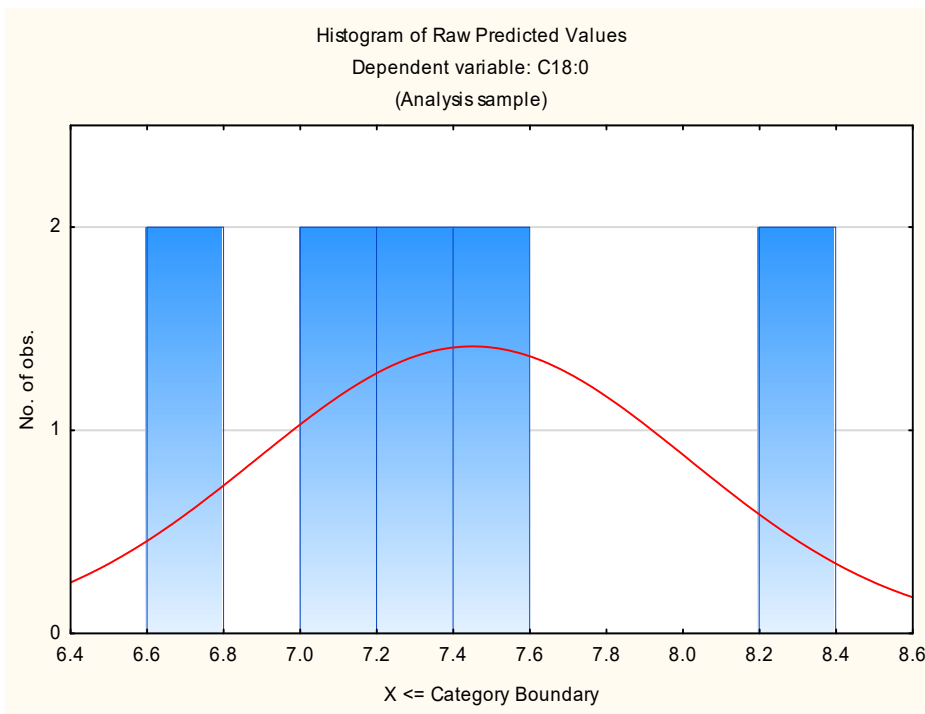

| Univariate Tests of Significance for C18:1 (Ratio) |          |                  |          |          |          |
|----------------------------------------------------|----------|------------------|----------|----------|----------|
| Sigma-restricted parameterization                  |          |                  |          |          |          |
| Effective hypothesis decomposition                 |          |                  |          |          |          |
| Effect                                             | SS       | Degr. of Freedom | MS       | F        | p        |
| Intercept                                          | 7912.969 | 1                | 7912.969 | 2761.944 | 0.000000 |
| Ratio Seed : Methanol (w/v)                        | 19.976   | 4                | 4.994    | 1.743    | 0.276813 |
| Error                                              | 14.325   | 5                | 2.865    |          |          |



| Tukey HSD test; variable C18:1 (Ratio)       |                             |          |          |          |          |          |
|----------------------------------------------|-----------------------------|----------|----------|----------|----------|----------|
| Approximate Probabilities for Post Hoc Tests |                             |          |          |          |          |          |
| Error: Between MS = 2.8650, df = 5.0000      |                             |          |          |          |          |          |
| Cell No.                                     | Ratio Seed : Methanol (w/v) | {1}      | {2}      | {3}      | {4}      | {5}      |
| 1                                            | 1:1                         | 26.100   | 0.965361 | 0.527627 | 0.247025 | 0.703752 |
| 2                                            | 1:2                         | 0.965361 | 27.150   | 0.831187 | 0.460610 | 0.952870 |
| 3                                            | 1:3                         | 0.527627 | 0.831187 | 28.900   | 0.929735 | 0.995518 |
| 4                                            | 1:4                         | 0.247025 | 0.460610 | 0.929735 | 30.200   | 0.790785 |
| 5                                            | 1:5                         | 0.703752 | 0.952870 | 0.995518 | 0.790785 | 28.300   |

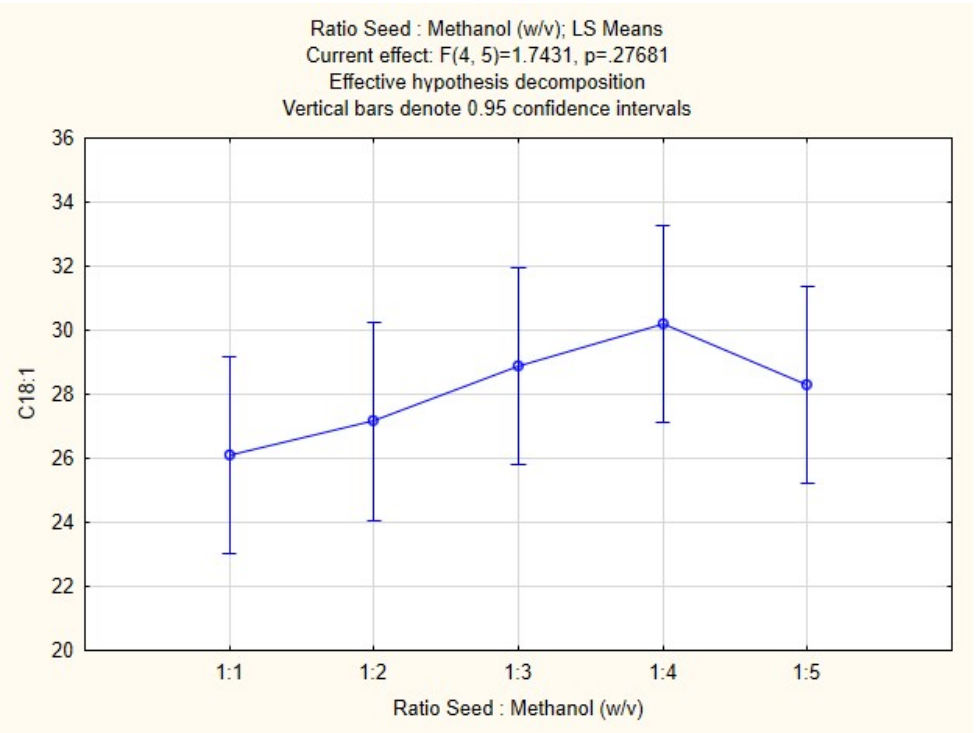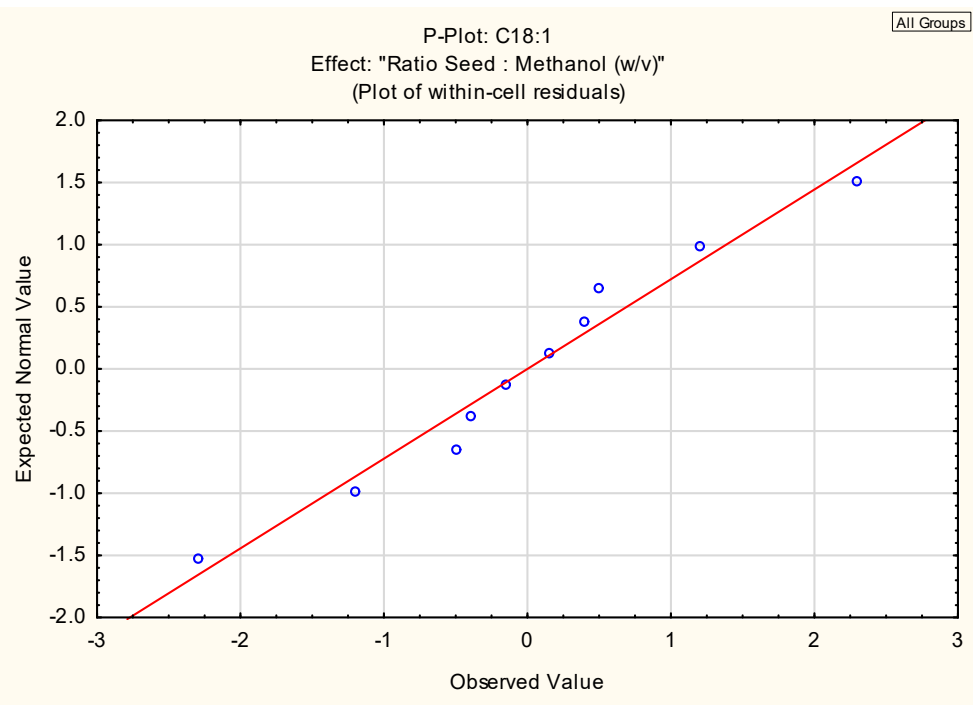

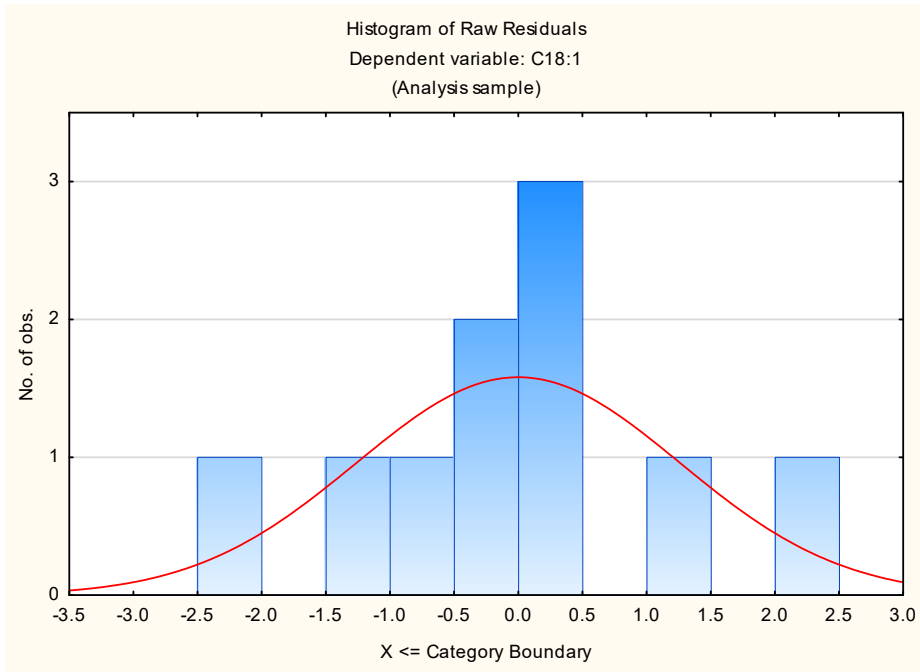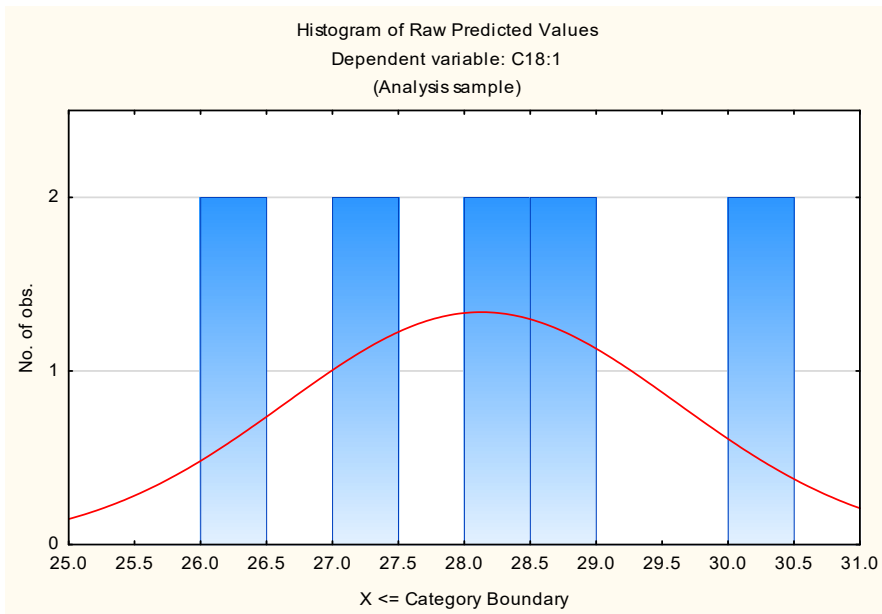

|                             |  | Univariate Tests of Significance for C18:2 (Ratio) |                  |          |          |          |
|-----------------------------|--|----------------------------------------------------|------------------|----------|----------|----------|
|                             |  | Sigma-restricted parameterization                  |                  |          |          |          |
|                             |  | Effective hypothesis decomposition                 |                  |          |          |          |
| Effect                      |  | SS                                                 | Degr. of Freedom | MS       | F        | p        |
| Intercept                   |  | 15280.28                                           | 1                | 15280.28 | 4392.147 | 0.000000 |
| Ratio Seed : Methanol (w/v) |  | 20.79                                              | 4                | 5.20     | 1.494    | 0.330642 |
| Error                       |  | 17.40                                              | 5                | 3.48     |          |          |

| Tukey HSD test; variable C18:2 (Ratio)       |                             |          |          |          |          |          |
|----------------------------------------------|-----------------------------|----------|----------|----------|----------|----------|
| Approximate Probabilities for Post Hoc Tests |                             |          |          |          |          |          |
| Error: Between MS = 3.4790, df = 5.0000      |                             |          |          |          |          |          |
| Cell No.                                     | Ratio Seed : Methanol (w/v) | {1}      | {2}      | {3}      | {4}      | {5}      |
| 1                                            | 1:1                         | 40.450   | 41.100   | 38.000   | 37.350   | 38.550   |
| 2                                            | 1:2                         | 0.995808 |          | 0.696801 | 0.523963 | 0.837831 |
| 3                                            | 1:3                         | 0.696801 | 0.523963 |          | 0.376241 | 0.669664 |
| 4                                            | 1:4                         | 0.523963 | 0.376241 | 0.995808 |          | 0.997794 |
| 5                                            | 1:5                         | 0.837831 | 0.669664 | 0.997794 | 0.960770 |          |

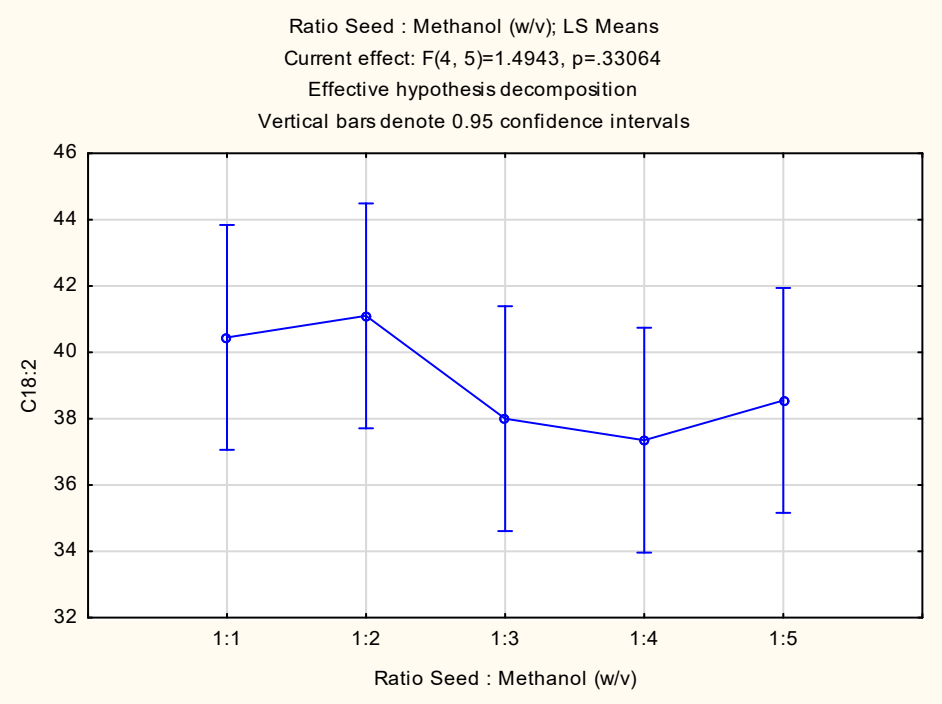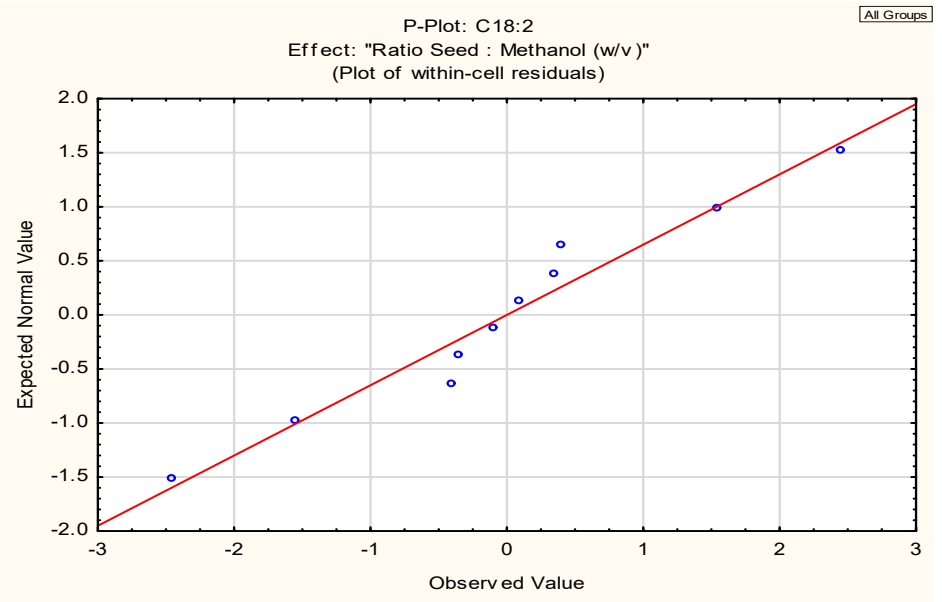

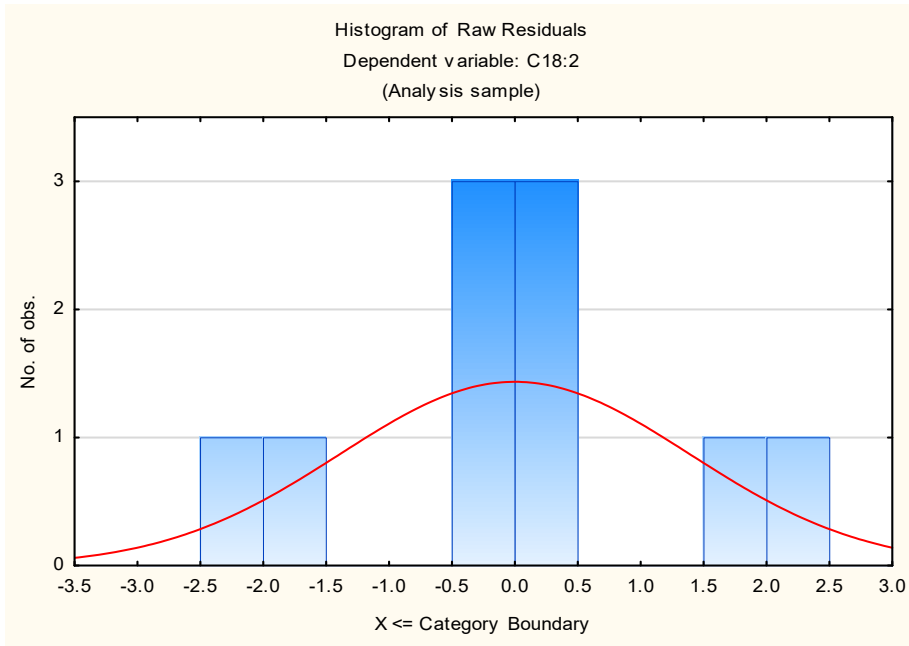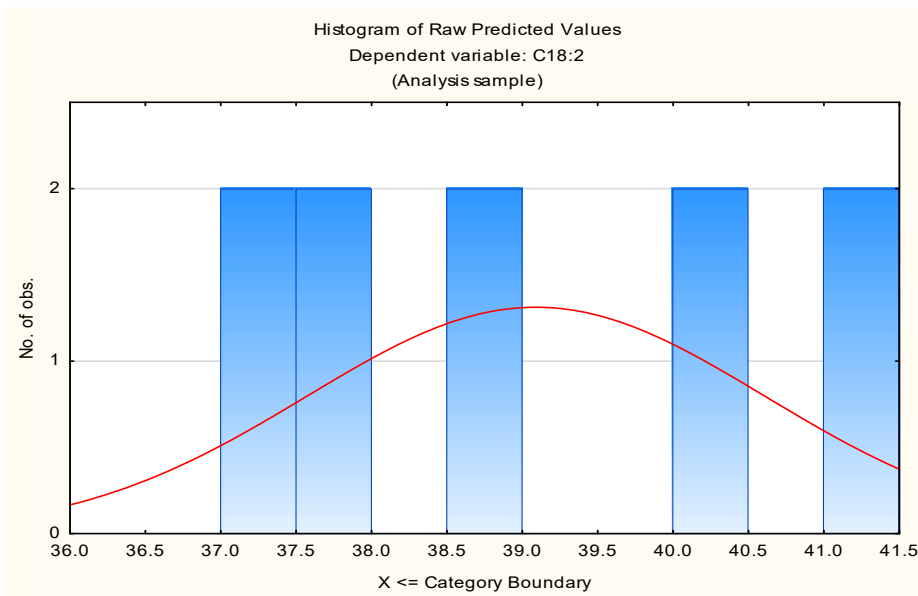

| Effect                      | Univariate Tests of Significance for C18:3 (Ratio)<br>Sigma-restricted parameterization<br>Effective hypothesis decomposition |                  |          |          |          |
|-----------------------------|-------------------------------------------------------------------------------------------------------------------------------|------------------|----------|----------|----------|
|                             | SS                                                                                                                            | Degr. of Freedom | MS       | F        | p        |
| Intercept                   | 2537.649                                                                                                                      | 1                | 2537.649 | 2170.786 | 0.000000 |
| Ratio Seed : Methanol (w/v) | 6.356                                                                                                                         | 4                | 1.589    | 1.359    | 0.365716 |
| Error                       | 5.845                                                                                                                         | 5                | 1.169    |          |          |

| Tukey HSD test; variable C18:3 (Ratio)       |                             |          |          |          |          |          |
|----------------------------------------------|-----------------------------|----------|----------|----------|----------|----------|
| Approximate Probabilities for Post Hoc Tests |                             |          |          |          |          |          |
| Error: Between MS = 1.1690, df = 5.0000      |                             |          |          |          |          |          |
| Cell No.                                     | Ratio Seed : Methanol (w/v) | {1}      | {2}      | {3}      | {4}      | {5}      |
| 1                                            | 1:1                         | 17.200   | 0.544703 | 0.659420 | 0.334538 | 0.937645 |
| 2                                            | 1:2                         | 0.544703 |          | 0.999155 | 0.982796 | 0.893608 |
| 3                                            | 1:3                         | 0.659420 | 0.999155 |          | 0.937645 | 0.959923 |
| 4                                            | 1:4                         | 0.334538 | 0.982796 | 0.937645 |          | 0.659420 |
| 5                                            | 1:5                         | 0.937645 | 0.893608 | 0.959923 | 0.659420 |          |

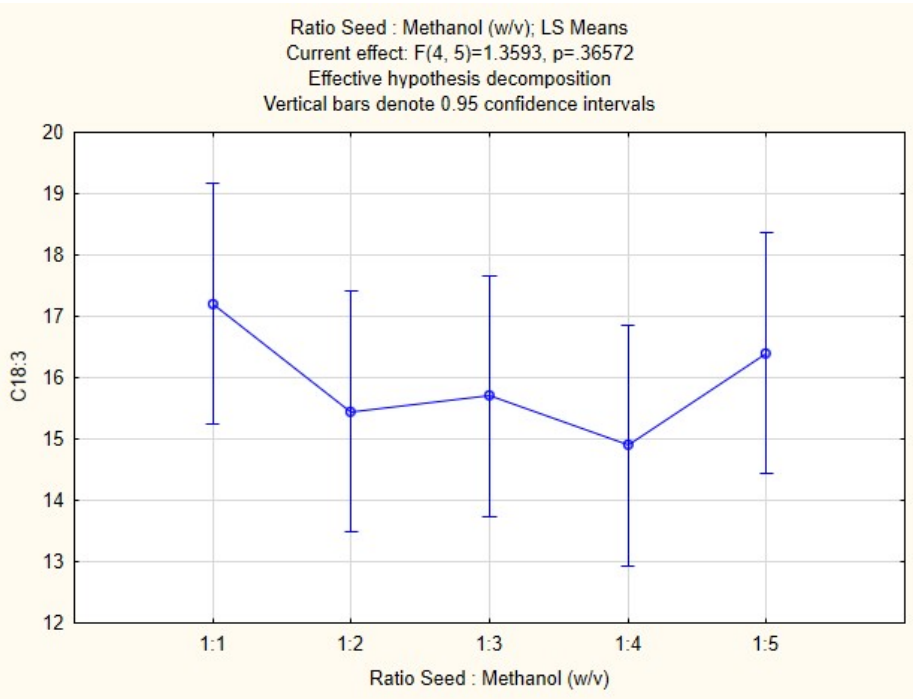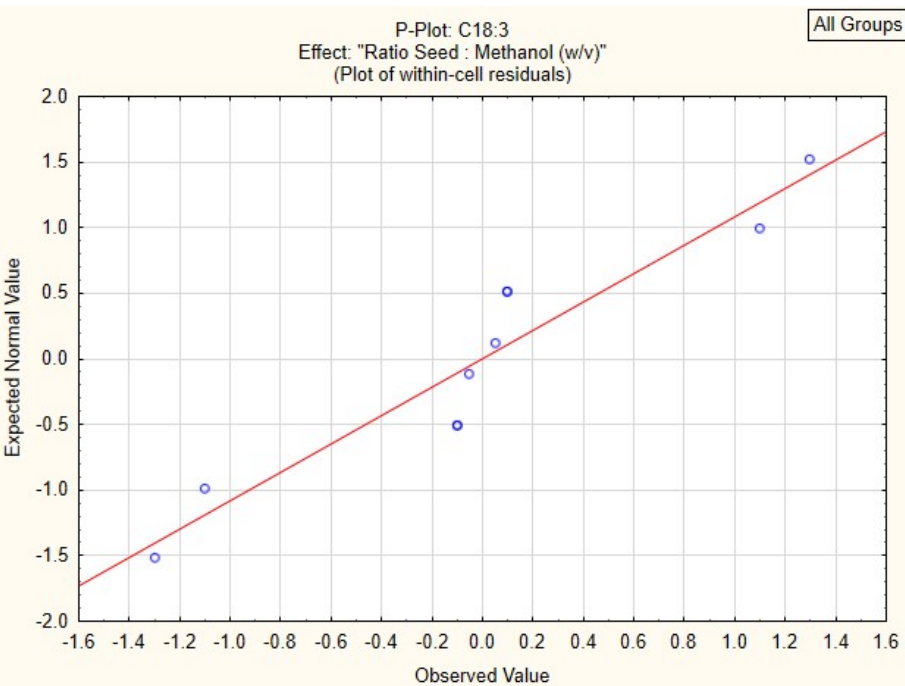

## Effect of catalyst concentration

| Effect                 | Univariate Tests of Significance for Biodiesel Conversion (%) (Catalyst Weight)<br>Sigma-restricted parameterization<br>Effective hypothesis decomposition |                  |          |          |          |
|------------------------|------------------------------------------------------------------------------------------------------------------------------------------------------------|------------------|----------|----------|----------|
|                        | SS                                                                                                                                                         | Degr. of Freedom | MS       | F        | p        |
| Intercept              | 57034.15                                                                                                                                                   | 1                | 57034.15 | 23386.39 | 0.000000 |
| Catalyst Weight (wt.%) | 1725.08                                                                                                                                                    | 3                | 575.03   | 235.79   | 0.000059 |
| Error                  | 9.76                                                                                                                                                       | 4                | 2.44     |          |          |

| Cell No. | Catalyst Weight (wt.%) | Tukey HSD test; variable Biodiesel Conversion (%) (Catalyst Weight)<br>Approximate Probabilities for Post Hoc Tests<br>Error: Between MS = 2.4388, df = 4.0000 |          |          |          |
|----------|------------------------|----------------------------------------------------------------------------------------------------------------------------------------------------------------|----------|----------|----------|
|          |                        | {1}                                                                                                                                                            | {2}      | {3}      | {4}      |
|          |                        | 60.335                                                                                                                                                         | 97.500   | 94.960   | 84.945   |
| 1        | 1                      |                                                                                                                                                                | 0.000309 | 0.000321 | 0.000547 |
| 2        | 3                      | 0.000309                                                                                                                                                       |          | 0.458062 | 0.004672 |
| 3        | 5                      | 0.000321                                                                                                                                                       | 0.458062 |          | 0.010570 |
| 4        | 7                      | 0.000547                                                                                                                                                       | 0.004672 | 0.010570 |          |

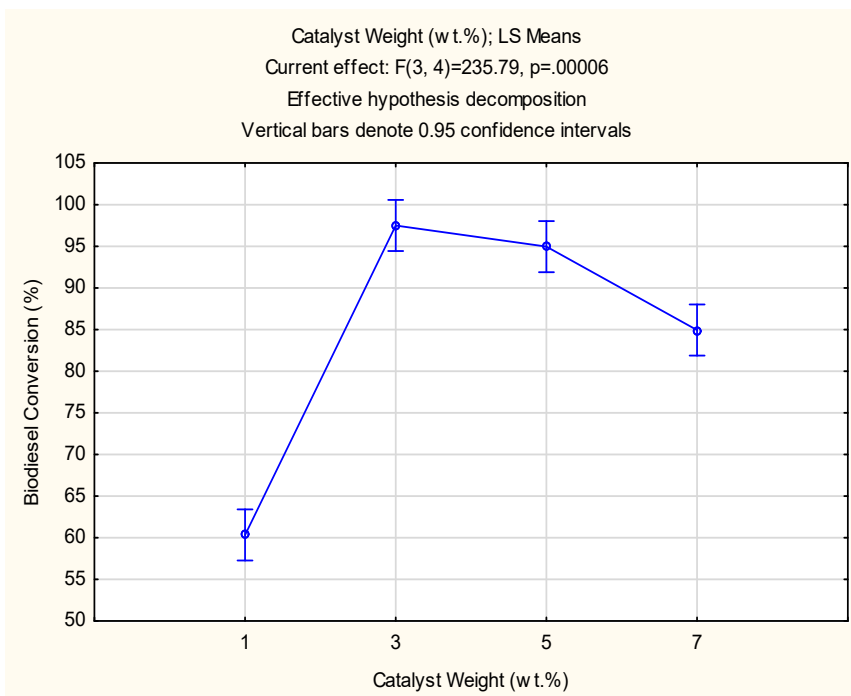

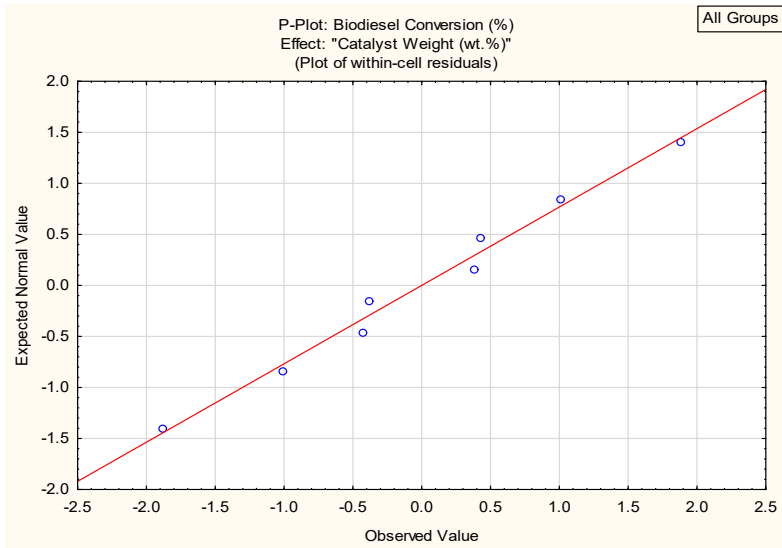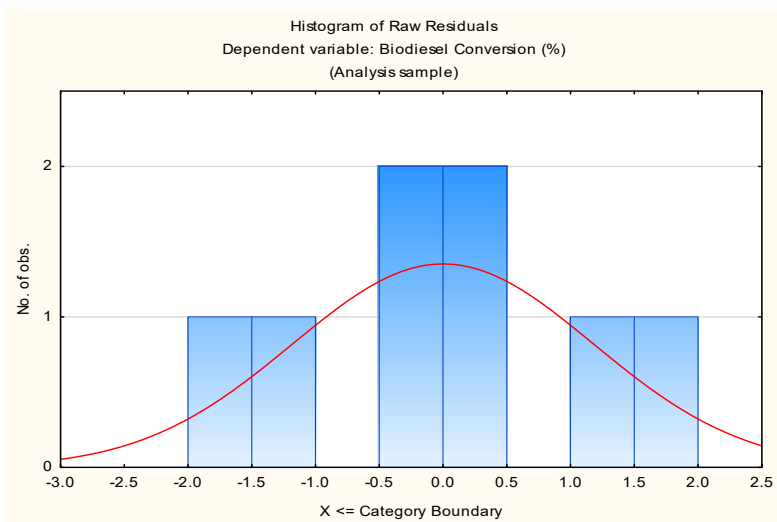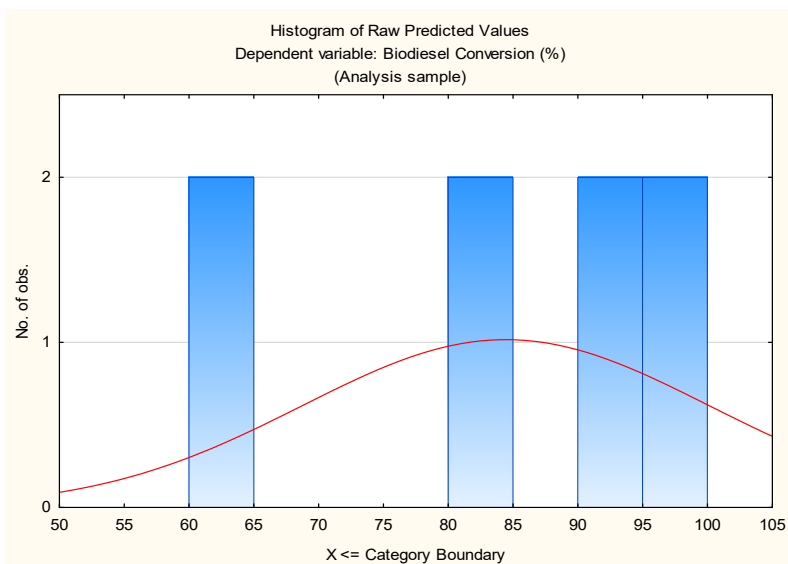

| Effect                 | Univariate Tests of Significance for C16:0 (Catalyst Weight)<br>Sigma-restricted parameterization<br>Effective hypothesis decomposition |                  |          |          |          |
|------------------------|-----------------------------------------------------------------------------------------------------------------------------------------|------------------|----------|----------|----------|
|                        | SS                                                                                                                                      | Degr. of Freedom | MS       | F        | p        |
| Intercept              | 623.0450                                                                                                                                | 1                | 623.0450 | 9585.308 | 0.000000 |
| Catalyst Weight (wt.%) | 0.2950                                                                                                                                  | 3                | 0.0983   | 1.513    | 0.340170 |
| Error                  | 0.2600                                                                                                                                  | 4                | 0.0650   |          |          |

| Cell No. | Tukey HSD test; variable C16:0 (Catalyst Weight)<br>Approximate Probabilities for Post Hoc Tests<br>Error: Between MS = .06500, df = 4.0000 |               |               |               |               |
|----------|---------------------------------------------------------------------------------------------------------------------------------------------|---------------|---------------|---------------|---------------|
|          | Catalyst Weight (wt.%)                                                                                                                      | {1}<br>8.7500 | {2}<br>8.9500 | {3}<br>8.5500 | {4}<br>9.0500 |
| 1        | 1                                                                                                                                           |               | 0.858508      | 0.858508      | 0.669972      |
| 2        | 3                                                                                                                                           | 0.858508      |               | 0.482623      | 0.976963      |
| 3        | 5                                                                                                                                           | 0.858508      | 0.482623      |               | 0.334239      |
| 4        | 7                                                                                                                                           | 0.669972      | 0.976963      | 0.334239      |               |

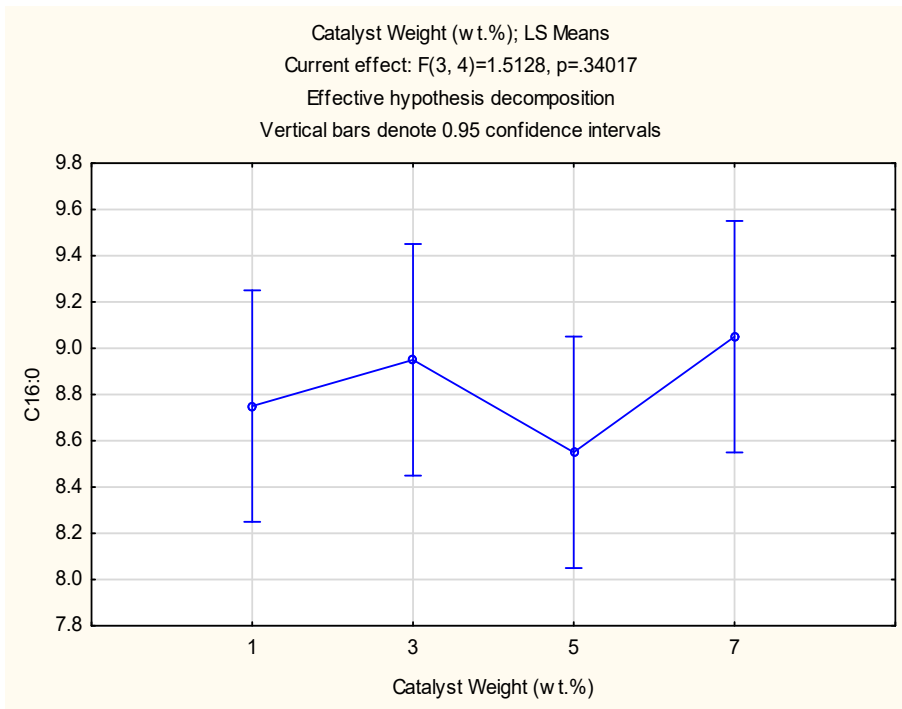



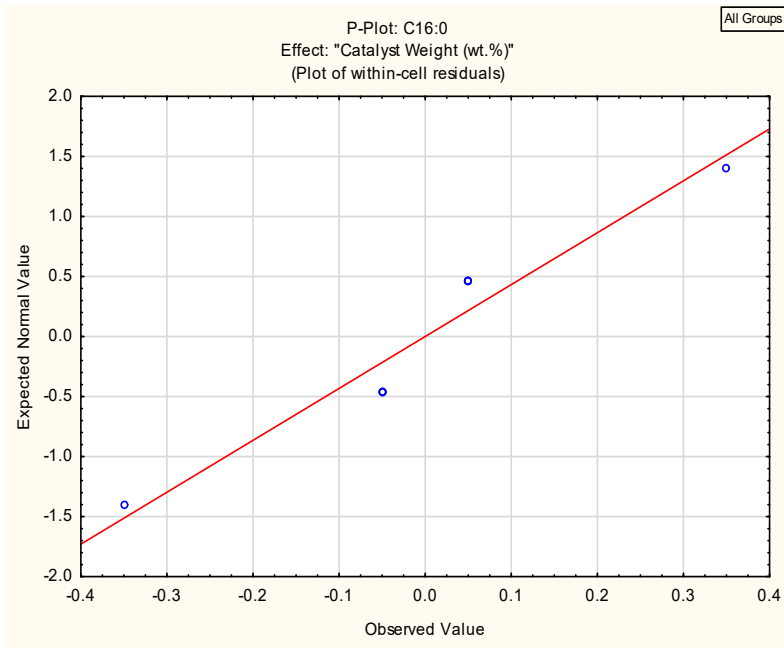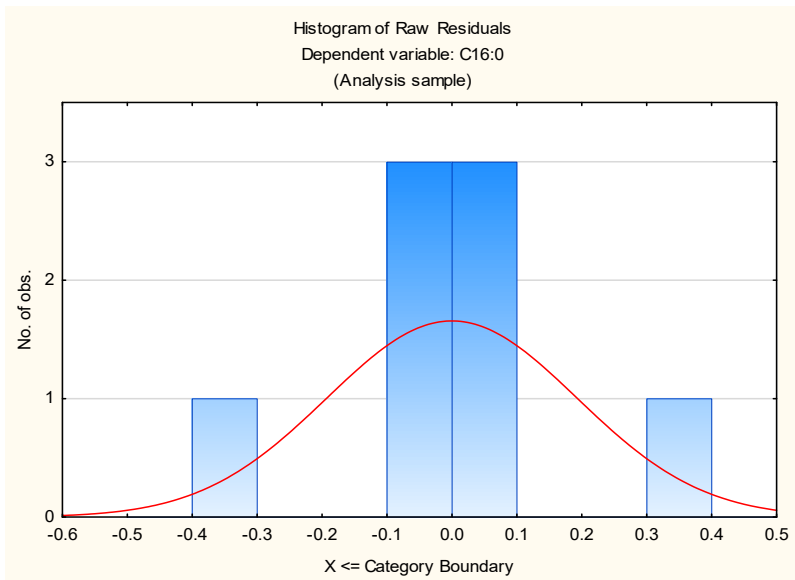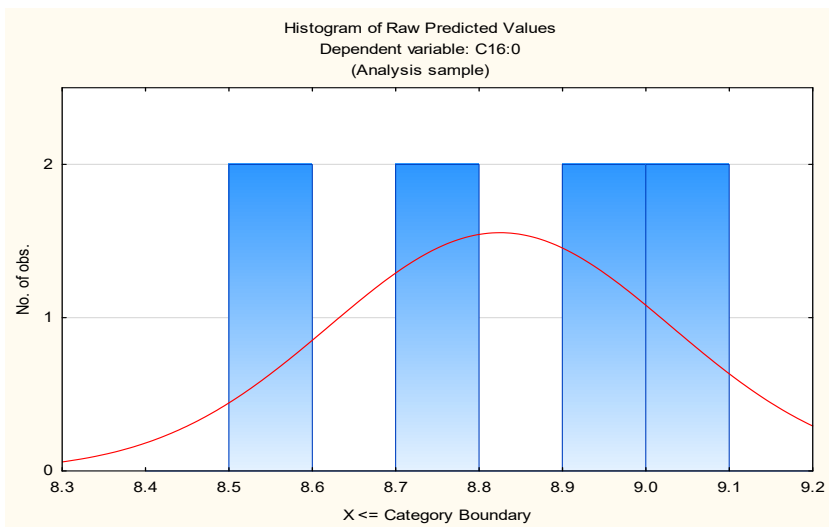

| Univariate Tests of Significance for C18:0 (Catalyst Weight) |          |                  |          |          |          |
|--------------------------------------------------------------|----------|------------------|----------|----------|----------|
| Sigma-restricted parameterization                            |          |                  |          |          |          |
| Effective hypothesis decomposition                           |          |                  |          |          |          |
| Effect                                                       | SS       | Degr. of Freedom | MS       | F        | p        |
| Intercept                                                    | 419.0513 | 1                | 419.0513 | 1201.581 | 0.000004 |
| Catalyst Weight (wt.%)                                       | 3.8038   | 3                | 1.2679   | 3.636    | 0.122246 |
| Error                                                        | 1.3950   | 4                | 0.3488   |          |          |

| Tukey HSD test; variable C18:0 (Catalyst Weight) |                        |          |          |          |          |
|--------------------------------------------------|------------------------|----------|----------|----------|----------|
| Approximate Probabilities for Post Hoc Tests     |                        |          |          |          |          |
| Error: Between MS = .34875, df = 4.0000          |                        |          |          |          |          |
| Cell No.                                         | Catalyst Weight (wt.%) | {1}      | {2}      | {3}      | {4}      |
| 1                                                | 1                      | 6.0500   | 7.5500   | 7.6000   | 7.7500   |
| 2                                                | 3                      | 0.191403 | 0.191403 | 0.176591 | 0.139207 |
| 3                                                | 5                      | 0.176591 | 0.999755 | 0.999755 | 0.984832 |
| 4                                                | 7                      | 0.139207 | 0.984832 | 0.993422 | 0.993422 |

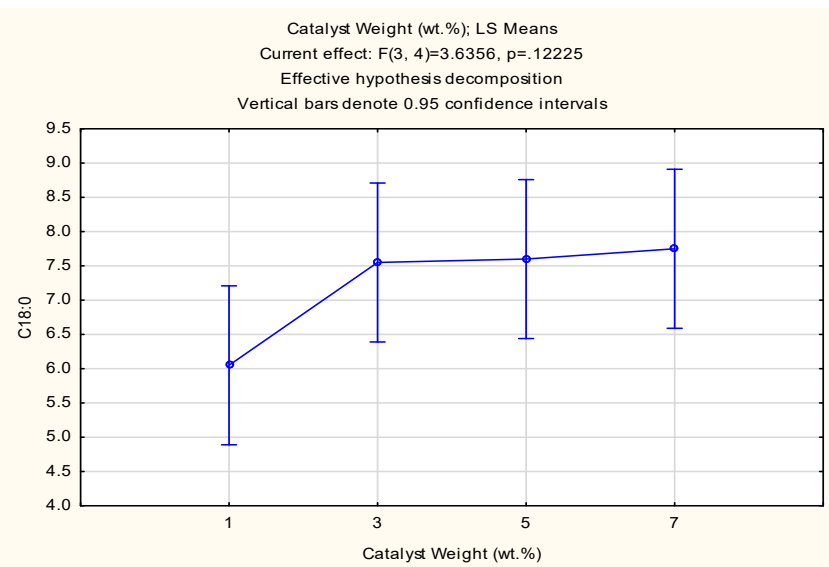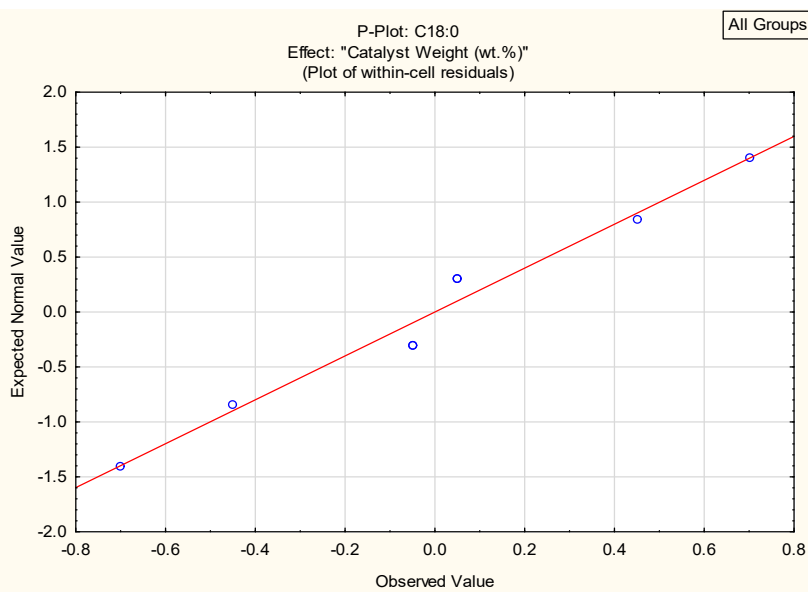

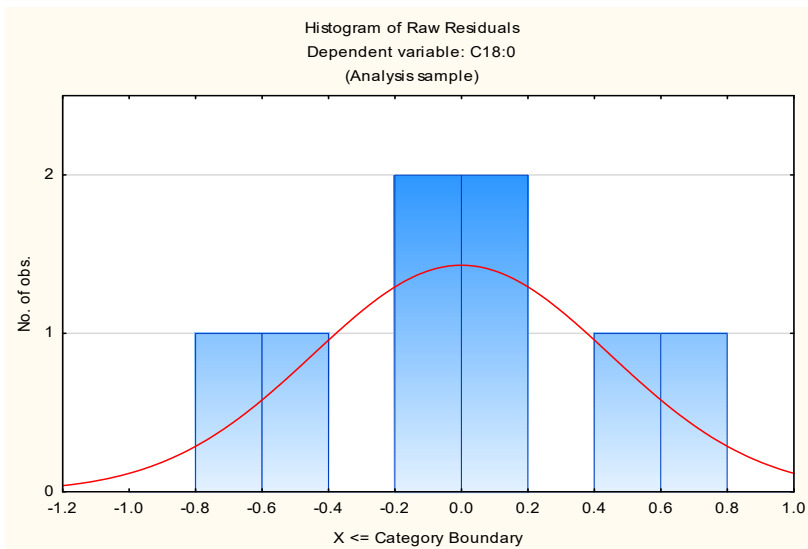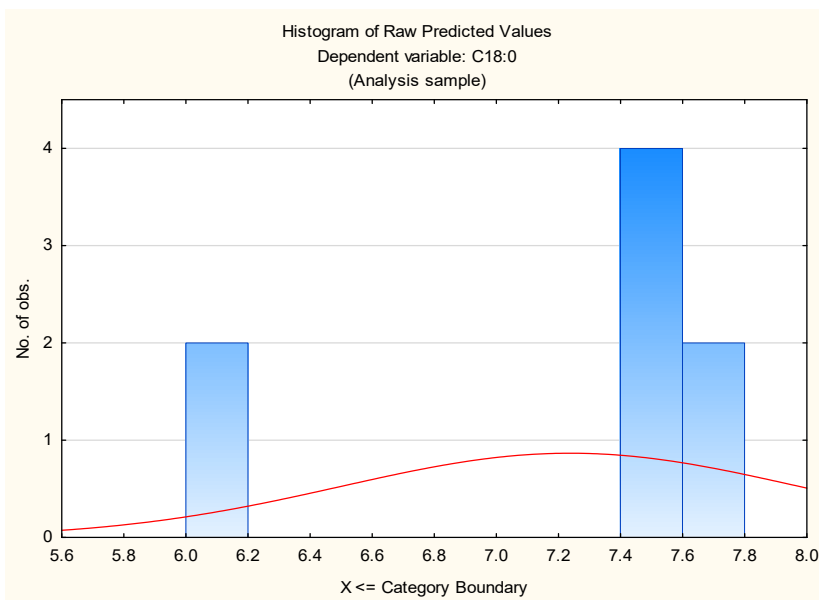

| Univariate Tests of Significance for C18:1 (Catalyst Weight) |          |                  |          |          |          |
|--------------------------------------------------------------|----------|------------------|----------|----------|----------|
| Sigma-restricted parameterization                            |          |                  |          |          |          |
| Effective hypothesis decomposition                           |          |                  |          |          |          |
| Effect                                                       | SS       | Degr. of Freedom | MS       | F        | p        |
| Intercept                                                    | 6728.000 | 1                | 6728.000 | 3463.578 | 0.000000 |
| Catalyst Weight (wt.%)                                       | 25.570   | 3                | 8.523    | 4.388    | 0.093545 |
| Error                                                        | 7.770    | 4                | 1.943    |          |          |

| Tukey HSD test; variable C18:1 (Catalyst Weight) |                        |          |          |          |          |
|--------------------------------------------------|------------------------|----------|----------|----------|----------|
| Approximate Probabilities for Post Hoc Tests     |                        |          |          |          |          |
| Error: Between MS = 1.9425, df = 4.0000          |                        |          |          |          |          |
| Cell No.                                         | Catalyst Weight (wt.%) | {1}      | {2}      | {3}      | {4}      |
| 1                                                | 1                      | 29.150   | 28.900   | 26.450   | 31.500   |
| 2                                                | 3                      | 0.997663 | 0.997663 | 0.405553 | 0.366327 |
| 3                                                | 5                      | 0.341992 | 0.405553 | 0.072089 | 0.072089 |
| 4                                                | 7                      | 0.433610 | 0.366327 | 0.072089 | 0.072089 |

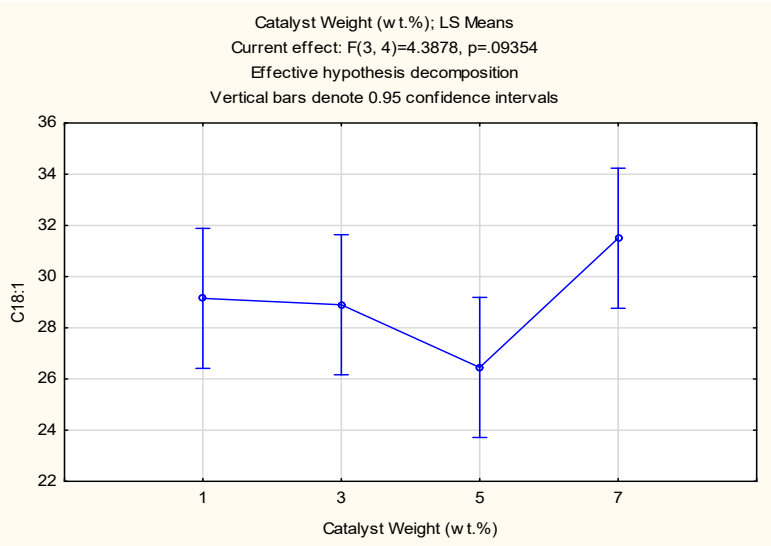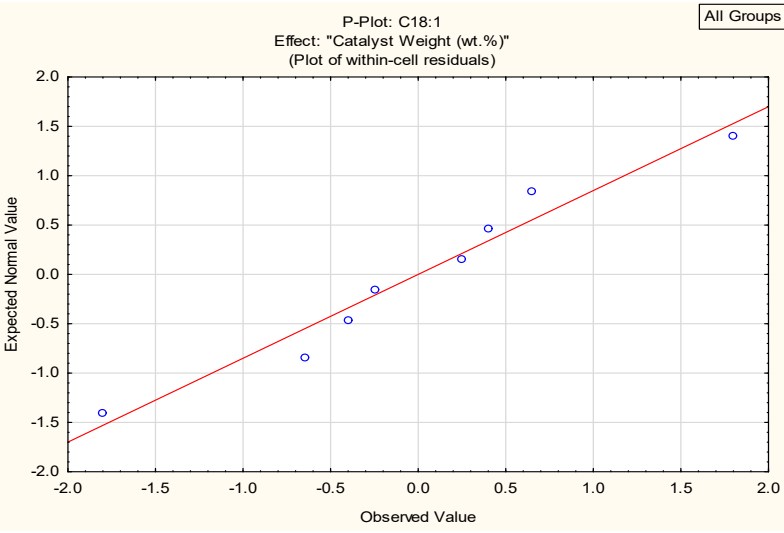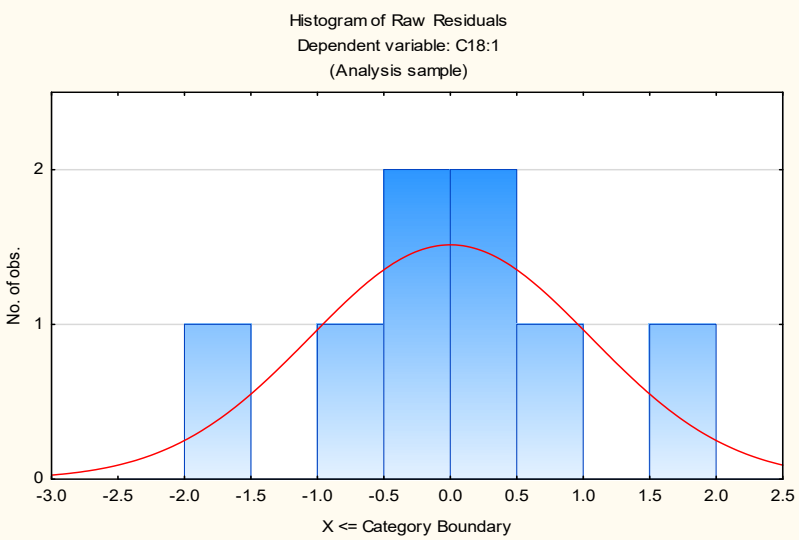

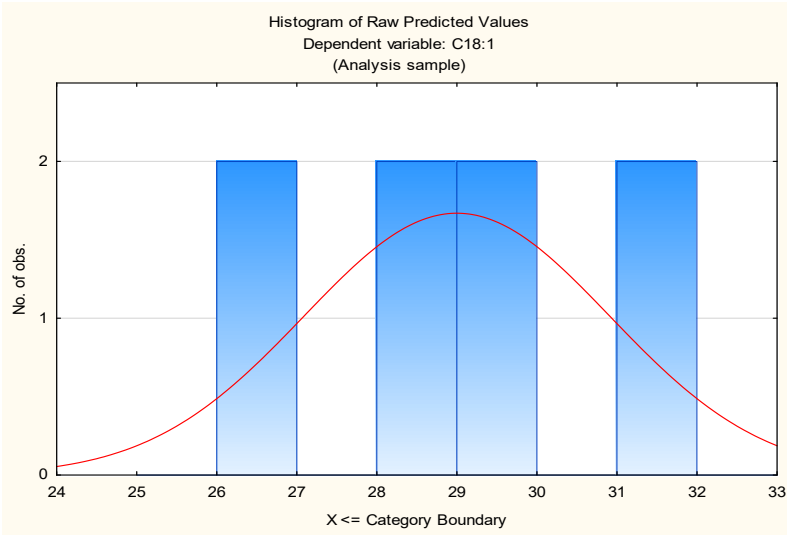

Univariate Tests of Significance for C18:2 (Catalyst Weight)  
Sigma-restricted parameterization  
Effective hypothesis decomposition

| Effect                 | SS       | Degr. of Freedom | MS       | F        | p        |
|------------------------|----------|------------------|----------|----------|----------|
| Intercept              | 11827.22 | 1                | 11827.22 | 16776.20 | 0.000000 |
| Catalyst Weight (wt.%) | 8.86     | 3                | 2.95     | 4.19     | 0.100060 |
| Error                  | 2.82     | 4                | 0.71     |          |          |

Tukey HSD test; variable C18:2 (Catalyst Weight)  
Approximate Probabilities for Post Hoc Tests  
Error: Between MS = .70500, df = 4.0000

| Cell No. | Catalyst Weight (wt.%) | {1}      | {2}      | {3}      | {4}      |
|----------|------------------------|----------|----------|----------|----------|
| 1        | 1                      | 37.400   | 38.000   | 40.200   | 38.200   |
| 2        | 3                      | 0.886785 |          | 0.177357 | 0.994547 |
| 3        | 5                      | 0.092317 | 0.177357 |          | 0.222740 |
| 4        | 7                      | 0.781701 | 0.994547 | 0.222740 |          |

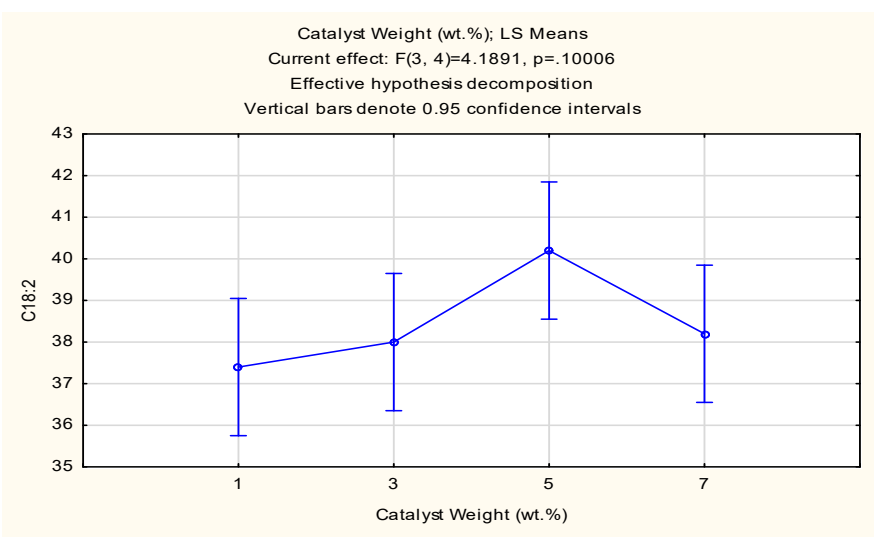

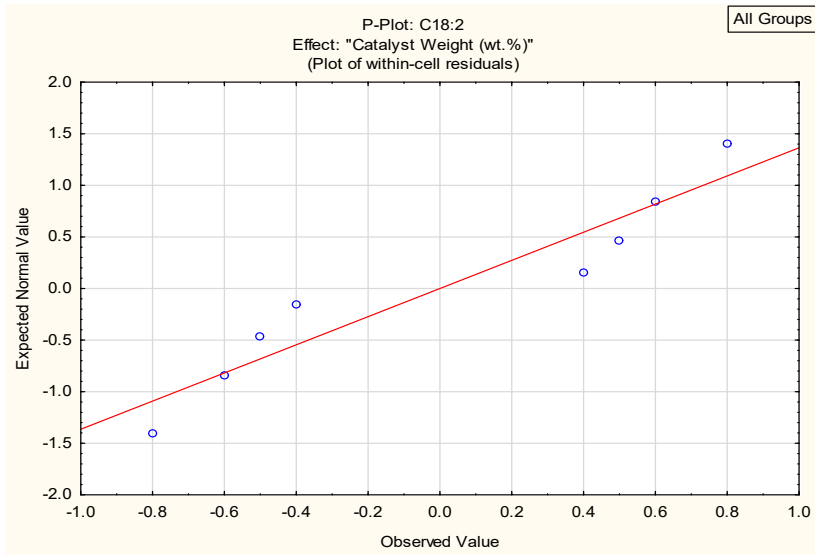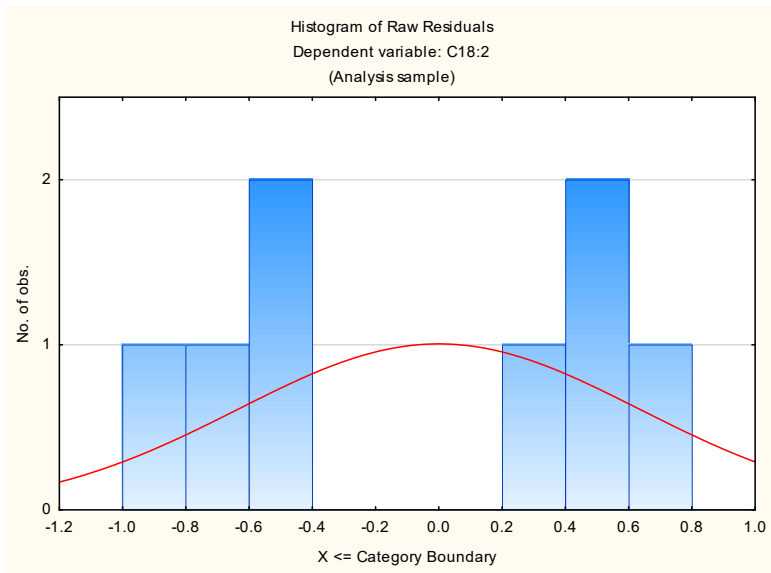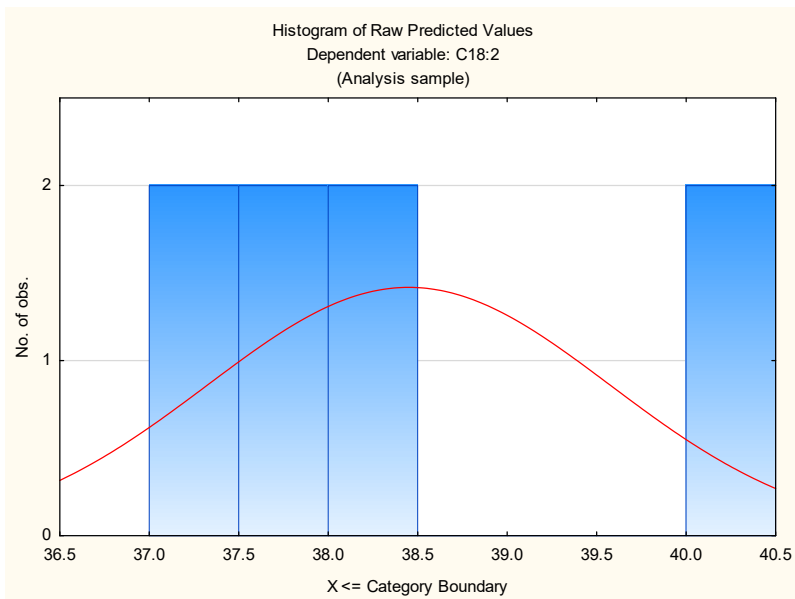

| Univariate Tests of Significance for C18:3 (Catalyst Weight) |          |                  |          |          |          |
|--------------------------------------------------------------|----------|------------------|----------|----------|----------|
| Sigma-restricted parameterization                            |          |                  |          |          |          |
| Effective hypothesis decomposition                           |          |                  |          |          |          |
| Effect                                                       | SS       | Degr. of Freedom | MS       | F        | p        |
| Intercept                                                    | 1971.920 | 1                | 1971.920 | 1002.247 | 0.000006 |
| Catalyst Weight (wt.%)                                       | 28.210   | 3                | 9.403    | 4.779    | 0.082433 |
| Error                                                        | 7.870    | 4                | 1.968    |          |          |

| Tukey HSD test; variable C18:3 (Catalyst Weight) |                        |          |          |          |          |
|--------------------------------------------------|------------------------|----------|----------|----------|----------|
| Approximate Probabilities for Post Hoc Tests     |                        |          |          |          |          |
| Error: Between MS = 1.9675, df = 4.0000          |                        |          |          |          |          |
| Cell No.                                         | Catalyst Weight (wt.%) | {1}      | {2}      | {3}      | {4}      |
| 1                                                | 1                      | 17.900   | 15.700   | 16.450   | 12.750   |
| 2                                                | 3                      | 0.482839 |          | 0.946097 | 0.291528 |
| 3                                                | 5                      | 0.741924 | 0.946097 |          | 0.174407 |
| 4                                                | 7                      | 0.069241 | 0.291528 | 0.174407 |          |

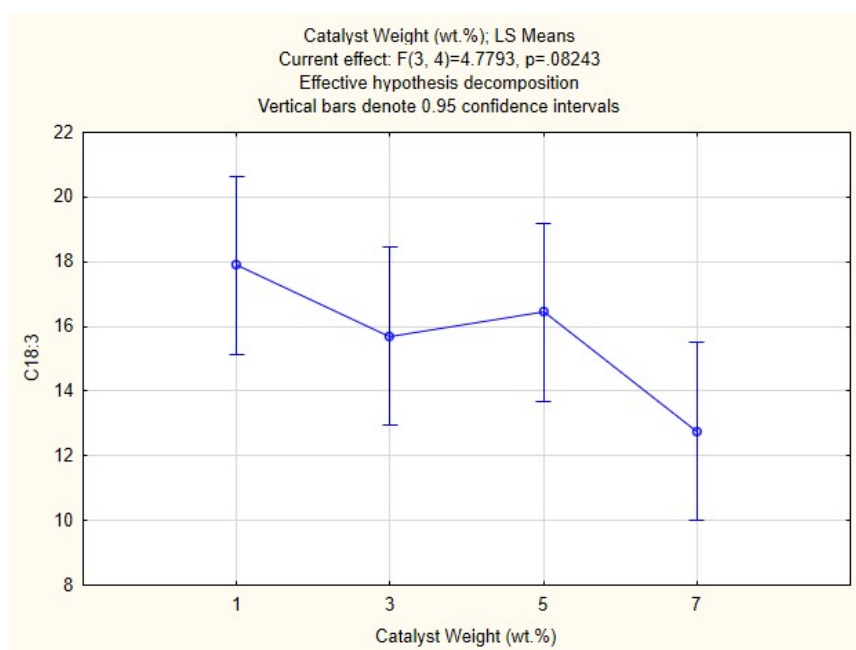

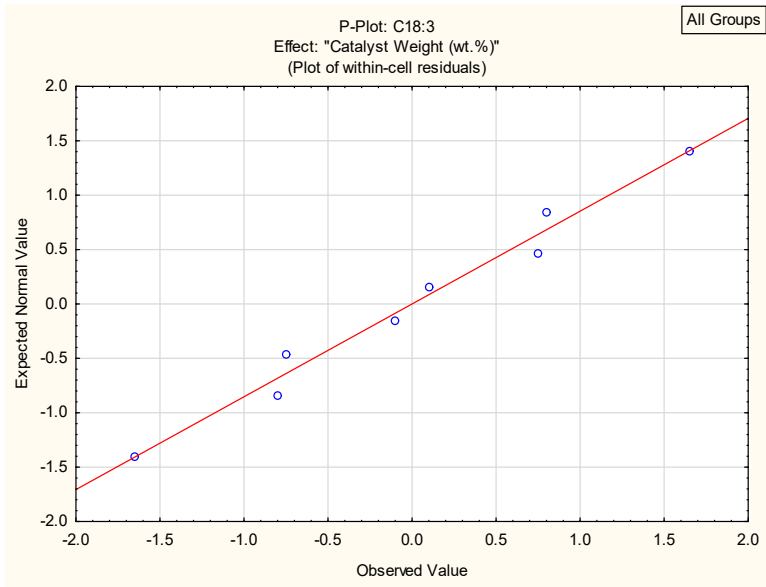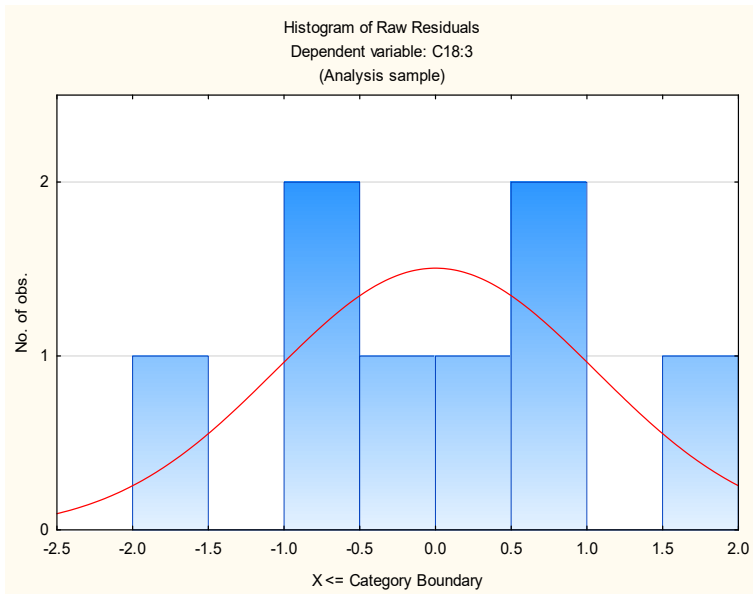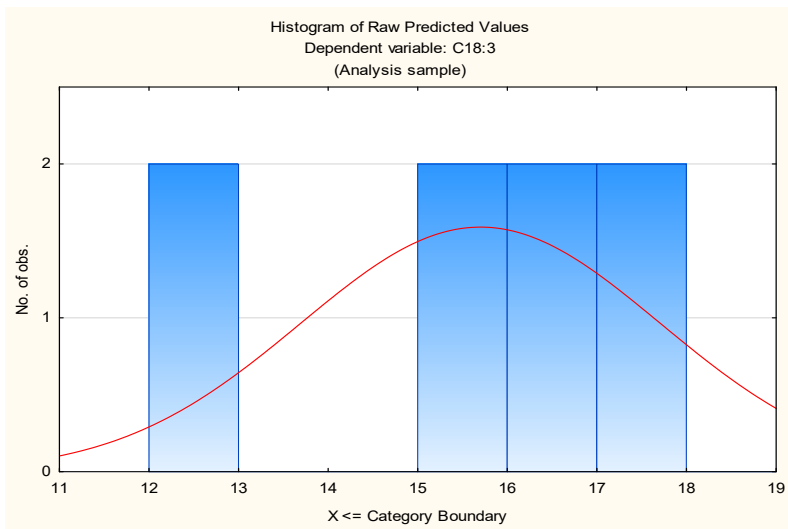



## Effect of Reaction Time

| Univariate Tests of Significance for Biodiesel Conversion (%) (Reaction Time) |          |                  |          |          |          |
|-------------------------------------------------------------------------------|----------|------------------|----------|----------|----------|
| Sigma-restricted parameterization                                             |          |                  |          |          |          |
| Effective hypothesis decomposition                                            |          |                  |          |          |          |
| Effect                                                                        | SS       | Degr. of Freedom | MS       | F        | p        |
| Intercept                                                                     | 48997.20 | 1                | 48997.20 | 87044.24 | 0.000000 |
| Reaction Time (min)                                                           | 3503.27  | 4                | 875.82   | 1555.90  | 0.000000 |
| Error                                                                         | 2.81     | 5                | 0.56     |          |          |

| Tukey HSD test; variable Biodiesel Conversion (%) (Reaction Time) |                     |          |          |          |          |          |
|-------------------------------------------------------------------|---------------------|----------|----------|----------|----------|----------|
| Approximate Probabilities for Post Hoc Tests                      |                     |          |          |          |          |          |
| Error: Between MS = .56290, df = 5.0000                           |                     |          |          |          |          |          |
| Cell No.                                                          | Reaction Time (min) | {1}      | {2}      | {3}      | {4}      | {5}      |
|                                                                   |                     | 50.005   | 53.280   | 97.500   | 86.300   | 62.905   |
| 1                                                                 | 3                   |          | 0.036294 | 0.000271 | 0.000271 | 0.000291 |
| 2                                                                 | 5                   | 0.036294 |          | 0.000271 | 0.000271 | 0.000471 |
| 3                                                                 | 7                   | 0.000271 | 0.000271 |          | 0.000337 | 0.000271 |
| 4                                                                 | 10                  | 0.000271 | 0.000271 | 0.000337 |          | 0.000271 |
| 5                                                                 | 15                  | 0.000291 | 0.000471 | 0.000271 | 0.000271 |          |

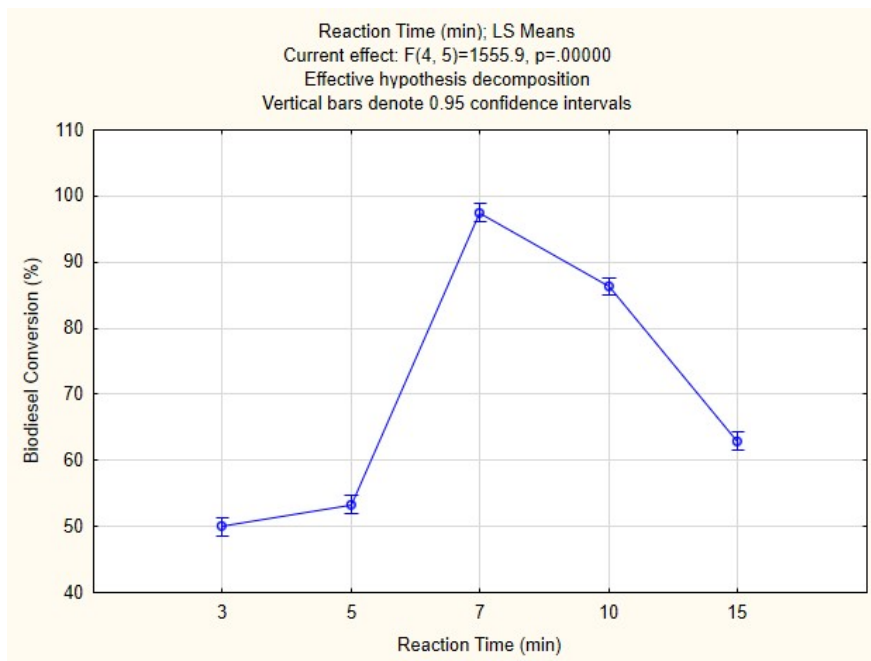

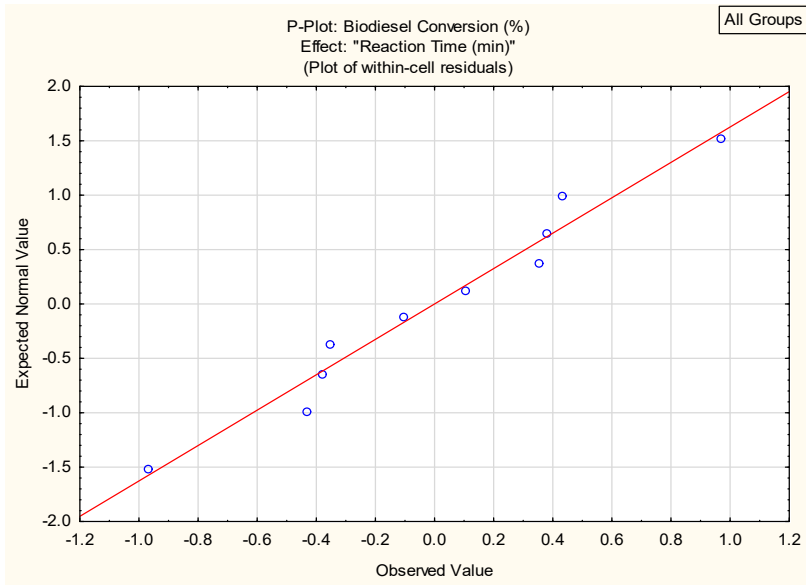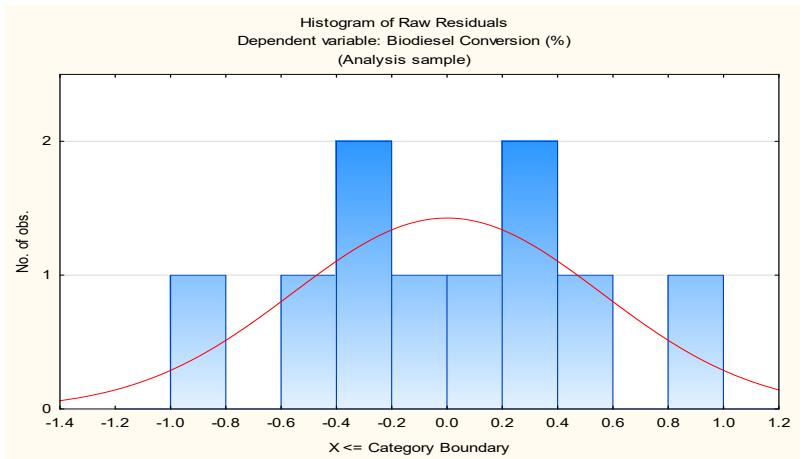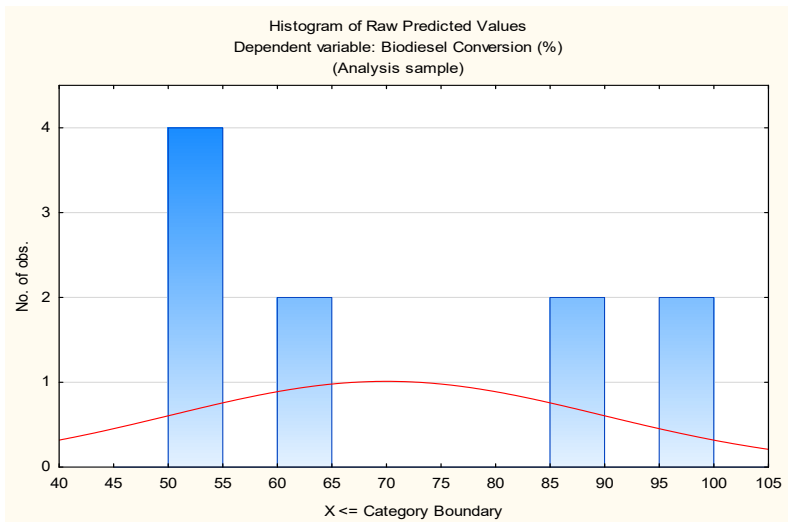

| Univariate Tests of Significance for C16:0 (Reaction Time) |          |                  |          |          |          |
|------------------------------------------------------------|----------|------------------|----------|----------|----------|
| Sigma-restricted parameterization                          |          |                  |          |          |          |
| Effective hypothesis decomposition                         |          |                  |          |          |          |
| Effect                                                     | SS       | Degr. of Freedom | MS       | F        | p        |
| Intercept                                                  | 770.8840 | 1                | 770.8840 | 6882.893 | 0.000000 |
| Reaction Time (min)                                        | 0.3360   | 4                | 0.0840   | 0.750    | 0.598331 |
| Error                                                      | 0.5600   | 5                | 0.1120   |          |          |

| Tukey HSD test; variable C16:0 (Reaction Time) |                     |          |          |          |          |          |
|------------------------------------------------|---------------------|----------|----------|----------|----------|----------|
| Approximate Probabilities for Post Hoc Tests   |                     |          |          |          |          |          |
| Error: Between MS = .11200, df = 5.0000        |                     |          |          |          |          |          |
| Cell No.                                       | Reaction Time (min) | {1}      | {2}      | {3}      | {4}      | {5}      |
|                                                |                     | 8.4500   | 8.7500   | 8.9500   | 8.8000   | 8.9500   |
| 1                                              | 3                   |          | 0.887111 | 0.605692 | 0.825918 | 0.605692 |
| 2                                              | 5                   | 0.887111 |          | 0.969548 | 0.999849 | 0.969548 |
| 3                                              | 7                   | 0.605692 | 0.969548 |          | 0.989172 | 1.000000 |
| 4                                              | 10                  | 0.825918 | 0.999849 | 0.989172 |          | 0.989172 |
| 5                                              | 15                  | 0.605692 | 0.969548 | 1.000000 | 0.989172 |          |

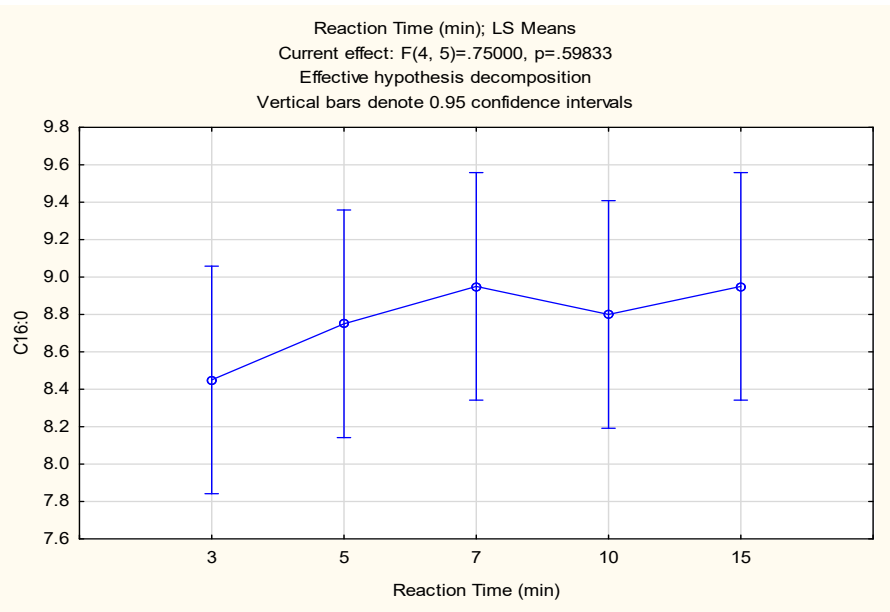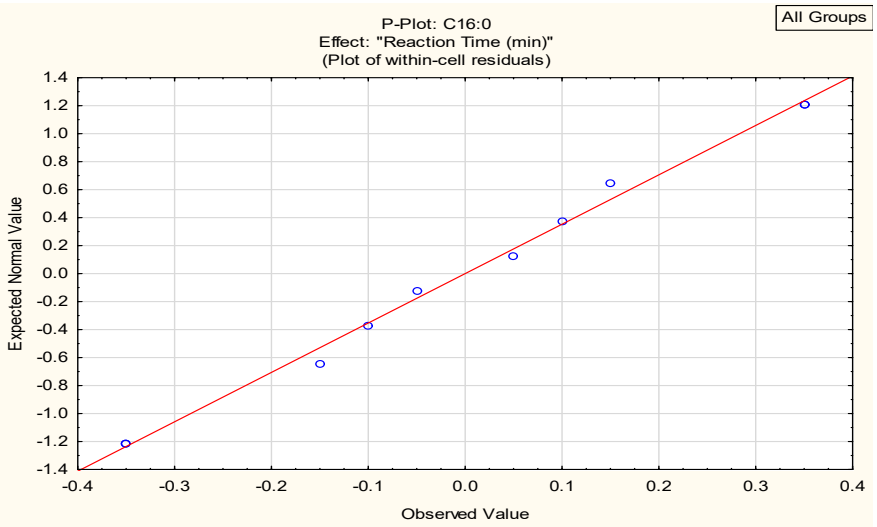

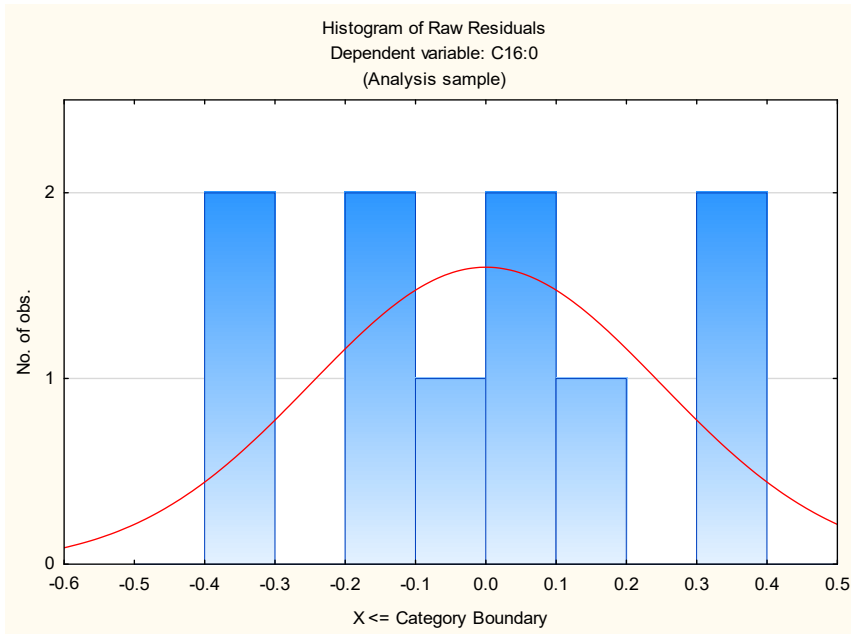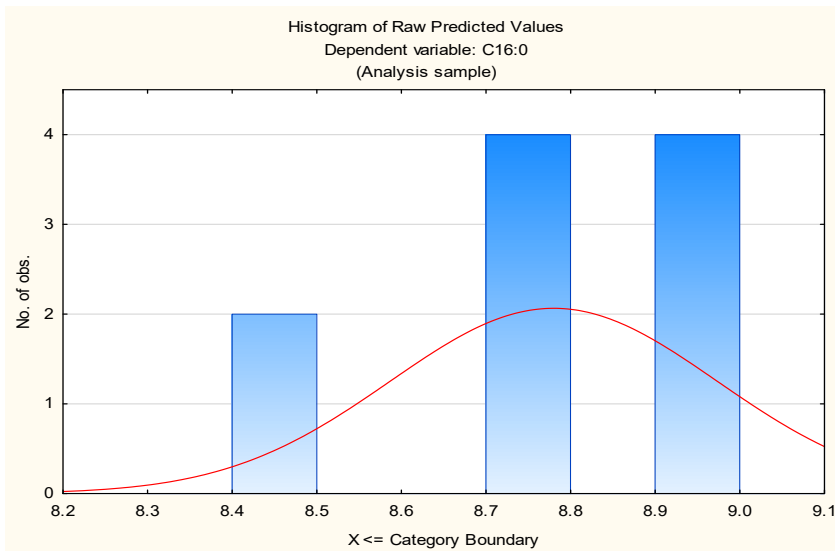

| Univariate Tests of Significance for C18:0 (Reaction Time)<br>Sigma-restricted parameterization<br>Effective hypothesis decomposition |          |                  |          |          |          |
|---------------------------------------------------------------------------------------------------------------------------------------|----------|------------------|----------|----------|----------|
| Effect                                                                                                                                | SS       | Degr. of Freedom | MS       | F        | p        |
| Intercept                                                                                                                             | 737.8810 | 1                | 737.8810 | 2313.107 | 0.000000 |
| Reaction Time (min)                                                                                                                   | 3.9740   | 4                | 0.9935   | 3.114    | 0.122215 |
| Error                                                                                                                                 | 1.5950   | 5                | 0.3190   |          |          |

| Tukey HSD test; variable C18:0 (Reaction Time)<br>Approximate Probabilities for Post Hoc Tests<br>Error: Between MS = .31900, df = 5.0000 |                     |          |          |          |          |          |
|-------------------------------------------------------------------------------------------------------------------------------------------|---------------------|----------|----------|----------|----------|----------|
| Cell No.                                                                                                                                  | Reaction Time (min) | {1}      | {2}      | {3}      | {4}      | {5}      |
| 1                                                                                                                                         | 3                   | 8.2500   | 0.689537 | 0.734002 | 0.856785 | 0.400338 |
| 2                                                                                                                                         | 5                   | 0.689537 | 9.0000   | 0.212377 | 0.995536 | 0.965485 |
| 3                                                                                                                                         | 7                   | 0.734002 | 0.212377 |          | 0.306520 | 0.111964 |
| 4                                                                                                                                         | 10                  | 0.856785 | 0.995536 | 0.306520 |          | 0.856785 |
| 5                                                                                                                                         | 15                  | 0.400338 | 0.965485 | 0.111964 | 0.856785 |          |

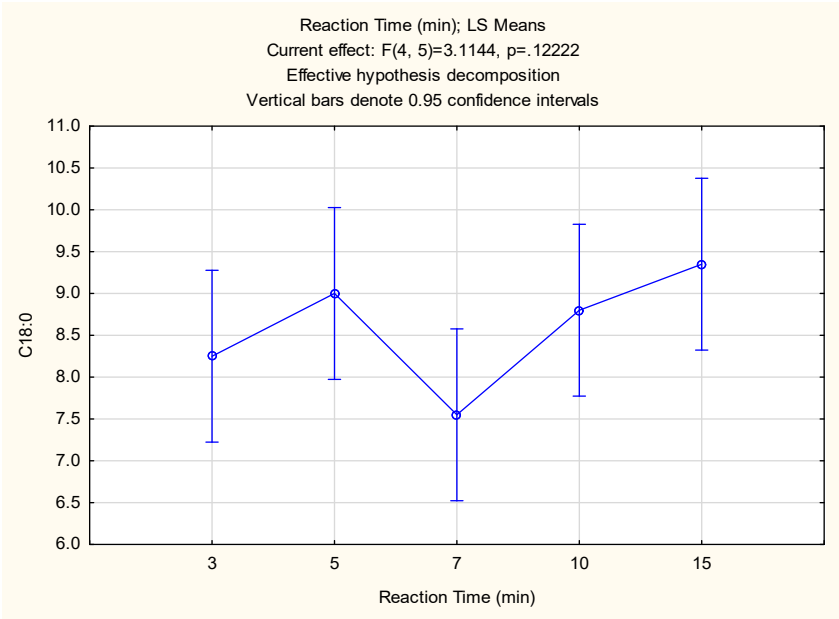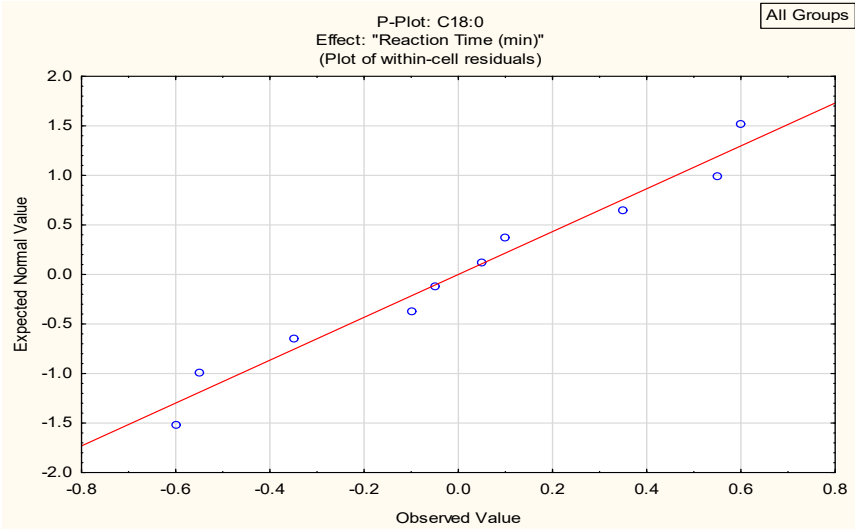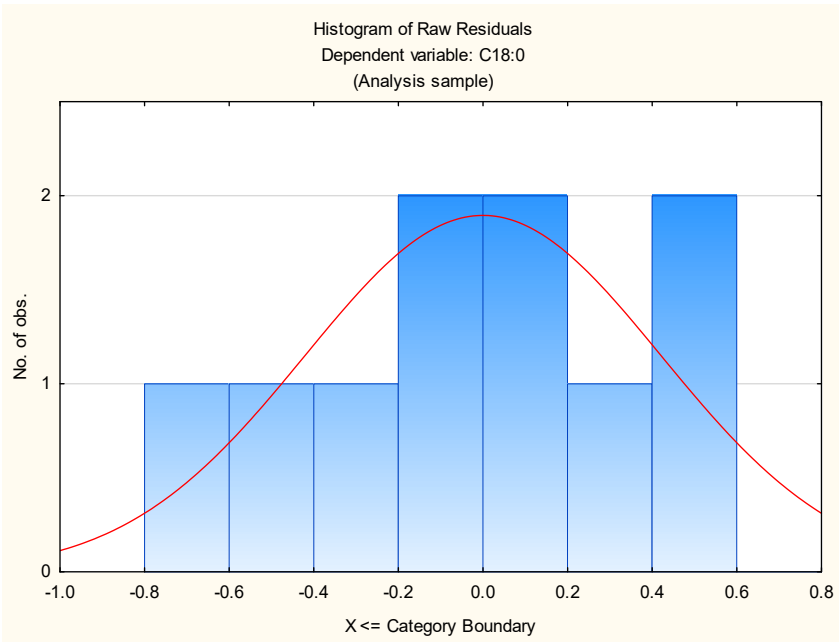

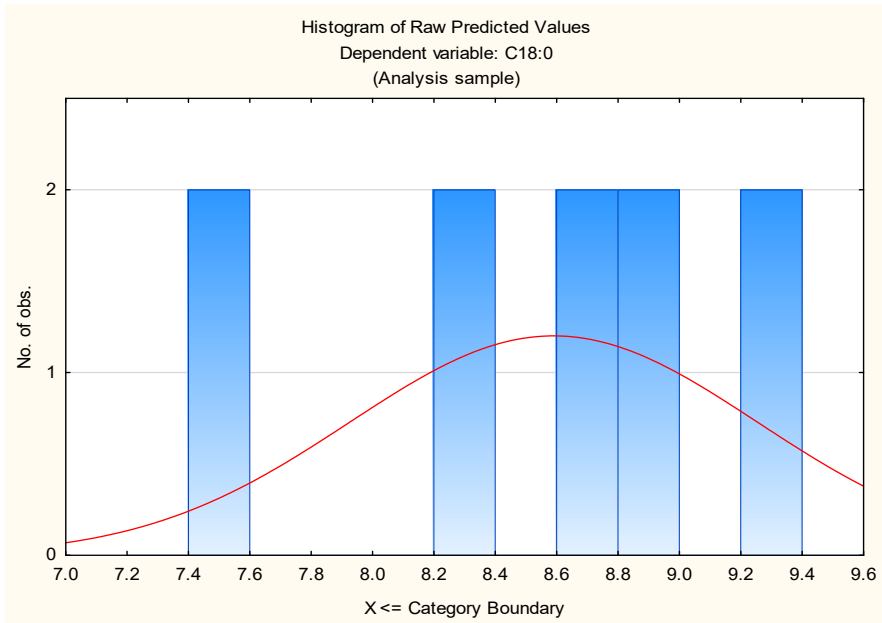

| Univariate Tests of Significance for C18:1 (Reaction Time) |          |                  |          |          |          |
|------------------------------------------------------------|----------|------------------|----------|----------|----------|
| Sigma-restricted parameterization                          |          |                  |          |          |          |
| Effective hypothesis decomposition                         |          |                  |          |          |          |
| Effect                                                     | SS       | Degr. of Freedom | MS       | F        | p        |
| Intercept                                                  | 8145.316 | 1                | 8145.316 | 9193.359 | 0.000000 |
| Reaction Time (min)                                        | 15.374   | 4                | 3.844    | 4.338    | 0.069597 |
| Error                                                      | 4.430    | 5                | 0.886    |          |          |

| Tukey HSD test; variable C18:1 (Reaction Time) |                     |          |          |          |          |          |
|------------------------------------------------|---------------------|----------|----------|----------|----------|----------|
| Approximate Probabilities for Post Hoc Tests   |                     |          |          |          |          |          |
| Error: Between MS = .88600, df = 5.0000        |                     |          |          |          |          |          |
| Cell No.                                       | Reaction Time (min) | {1}      | {2}      | {3}      | {4}      | {5}      |
| 1                                              | 3                   |          | 0.742750 | 0.609033 | 0.986269 | 0.100543 |
| 2                                              | 5                   | 0.742750 |          | 0.998550 | 0.506363 | 0.353844 |
| 3                                              | 7                   | 0.609033 | 0.998550 |          | 0.393390 | 0.458817 |
| 4                                              | 10                  | 0.986269 | 0.506363 | 0.393390 |          | 0.062854 |
| 5                                              | 15                  | 0.100543 | 0.353844 | 0.458817 | 0.062854 |          |

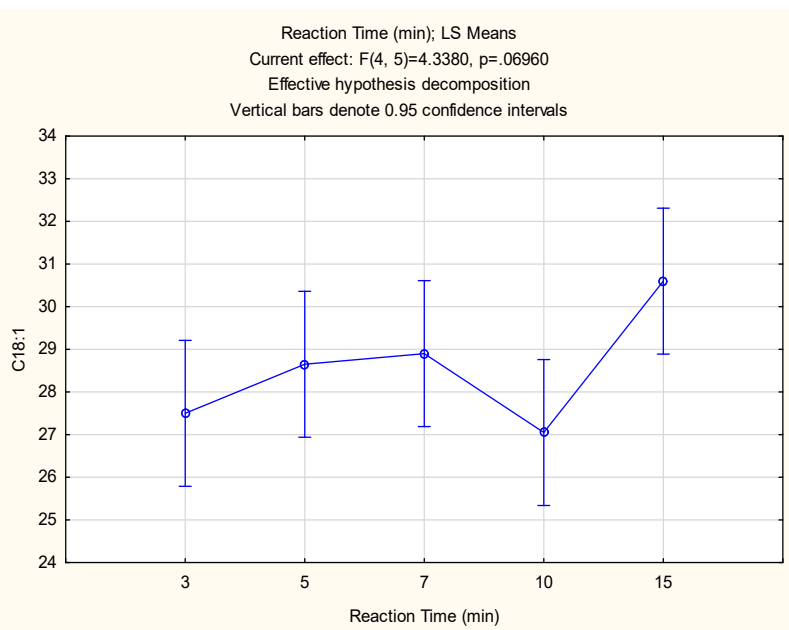

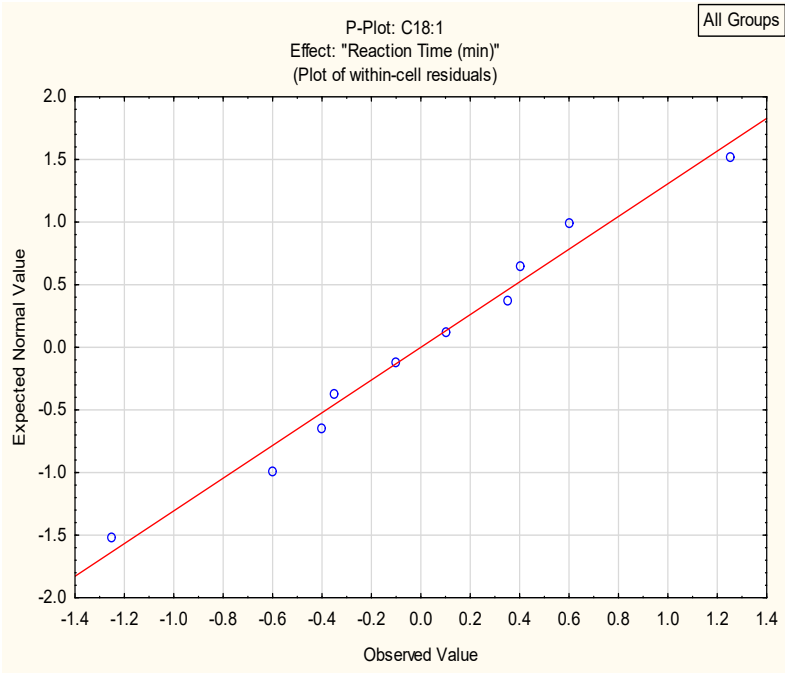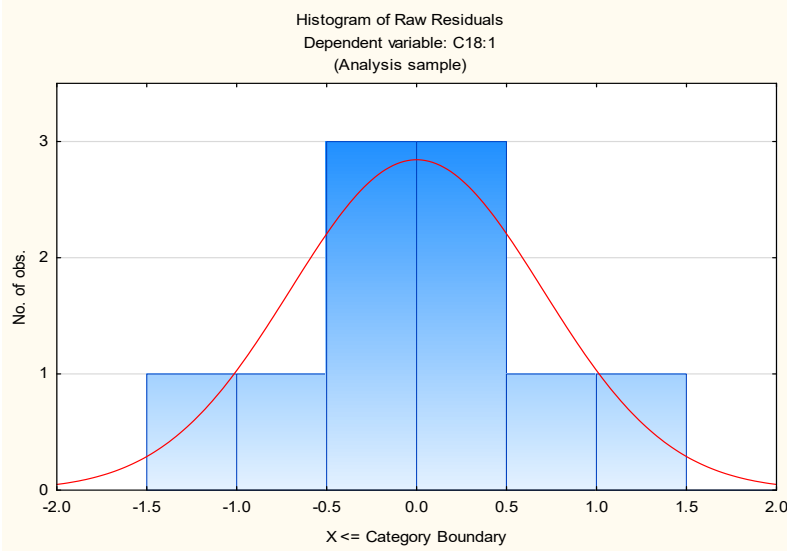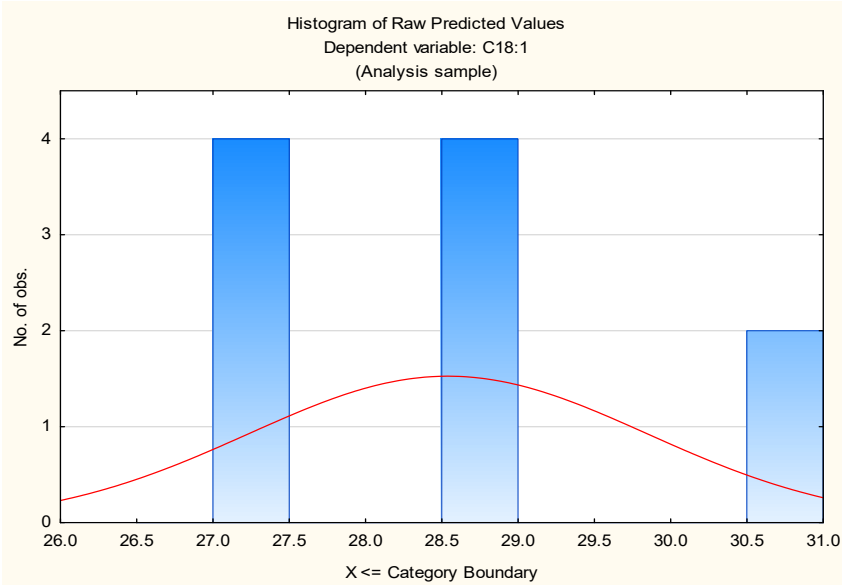

| Univariate Tests of Significance for C18:2 (Reaction Time) |          |                  |          |          |          |
|------------------------------------------------------------|----------|------------------|----------|----------|----------|
| Sigma-restricted parameterization                          |          |                  |          |          |          |
| Effective hypothesis decomposition                         |          |                  |          |          |          |
| Effect                                                     | SS       | Degr. of Freedom | MS       | F        | p        |
| Intercept                                                  | 13980.12 | 1                | 13980.12 | 3029.279 | 0.000000 |
| Reaction Time (min)                                        | 10.85    | 4                | 2.71     | 0.588    | 0.686500 |
| Error                                                      | 23.08    | 5                | 4.62     |          |          |

| Tukey HSD test; variable C18:2 (Reaction Time) |                     |          |          |          |          |          |
|------------------------------------------------|---------------------|----------|----------|----------|----------|----------|
| Approximate Probabilities for Post Hoc Tests   |                     |          |          |          |          |          |
| Error: Between MS = 4.6150, df = 5.0000        |                     |          |          |          |          |          |
| Cell No.                                       | Reaction Time (min) | {1}      | {2}      | {3}      | {4}      | {5}      |
| 1                                              | 3                   | 38.050   | 0.999426 | 0.864741 | 0.994590 | 0.936311 |
| 2                                              | 5                   | 0.999426 |          | 0.936311 | 0.972249 | 0.979340 |
| 3                                              | 7                   | 0.864741 | 0.936311 |          | 0.690165 | 0.999426 |
| 4                                              | 10                  | 0.994590 | 0.972249 | 0.690165 |          | 0.793289 |
| 5                                              | 15                  | 0.936311 | 0.979340 | 0.999426 | 0.793289 |          |

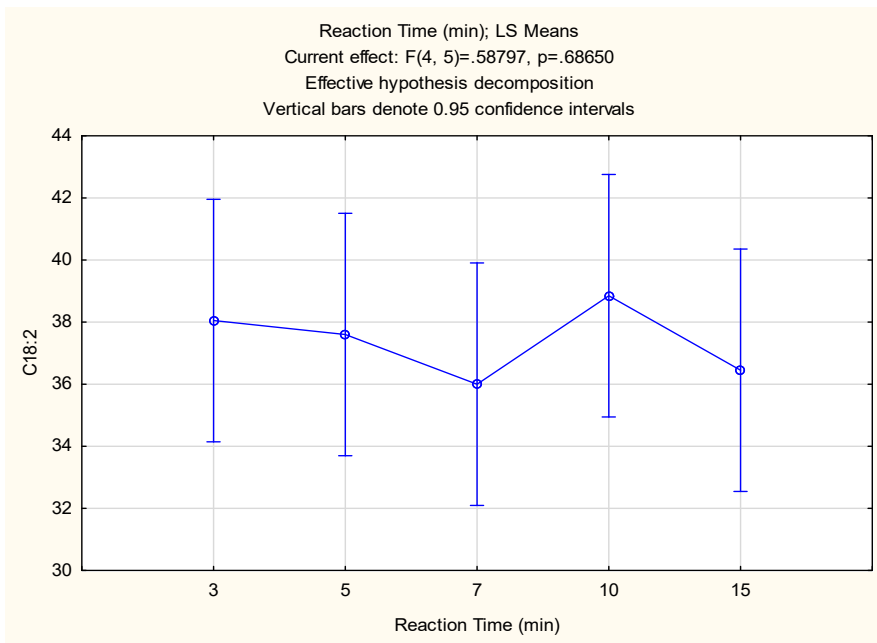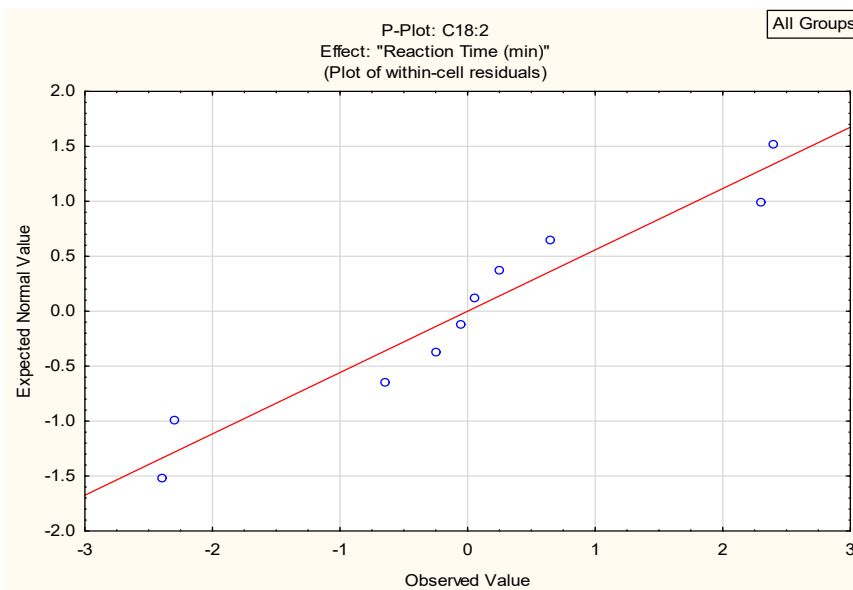



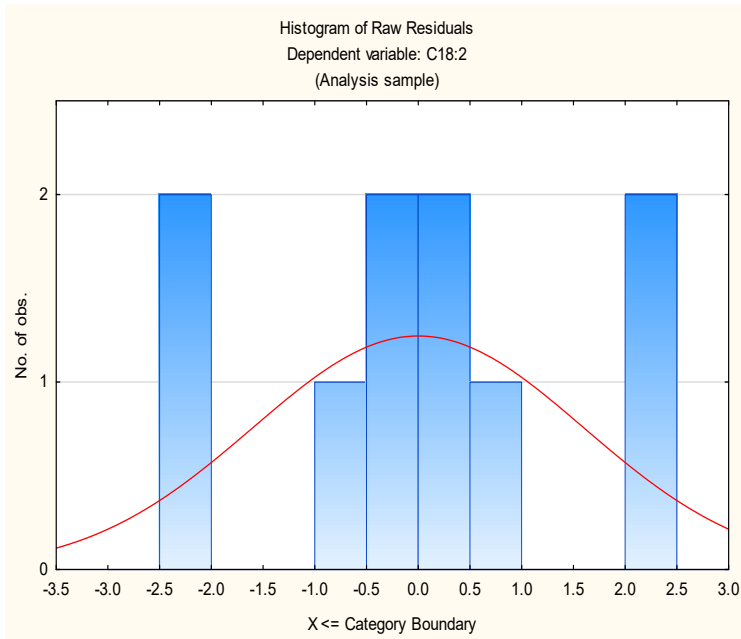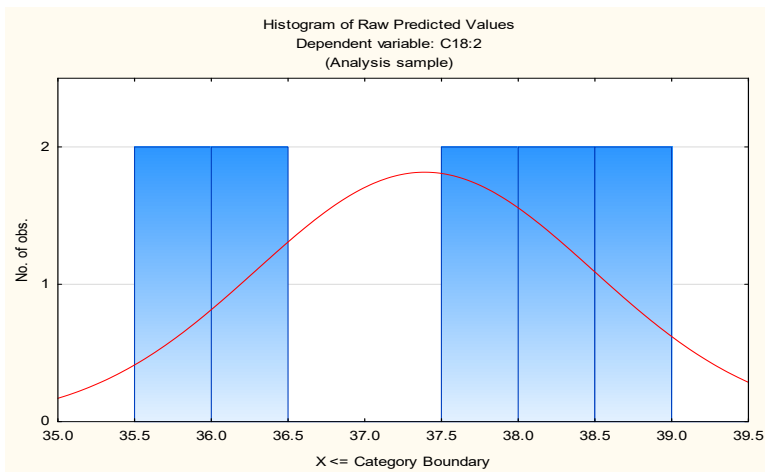

| Univariate Tests of Significance for C18:3 (Reaction Time) |          |                  |          |          |          |
|------------------------------------------------------------|----------|------------------|----------|----------|----------|
| Sigma-restricted parameterization                          |          |                  |          |          |          |
| Effective hypothesis decomposition                         |          |                  |          |          |          |
| Effect                                                     | SS       | Degr. of Freedom | MS       | F        | p        |
| Intercept                                                  | 2380.849 | 1                | 2380.849 | 5498.497 | 0.000000 |
| Reaction Time (min)                                        | 6.256    | 4                | 1.564    | 3.612    | 0.095760 |
| Error                                                      | 2.165    | 5                | 0.433    |          |          |

| Tukey HSD test, variable C18:3 (Reaction Time) |                     |          |          |          |          |          |
|------------------------------------------------|---------------------|----------|----------|----------|----------|----------|
| Approximate Probabilities for Post Hoc Tests   |                     |          |          |          |          |          |
| Error: Between MS = .43300, df = 5.0000        |                     |          |          |          |          |          |
| Cell No.                                       | Reaction Time (min) | {1}      | {2}      | {3}      | {4}      | {5}      |
| 1                                              | 3                   |          | 0.908507 | 0.979808 | 0.999990 | 0.103216 |
| 2                                              | 5                   | 0.908507 |          | 0.997521 | 0.932092 | 0.244665 |
| 3                                              | 7                   | 0.979808 | 0.997521 |          | 0.988464 | 0.178242 |
| 4                                              | 10                  | 0.999990 | 0.932092 | 0.988464 |          | 0.111466 |
| 5                                              | 15                  | 0.103216 | 0.244665 | 0.178242 | 0.111466 |          |

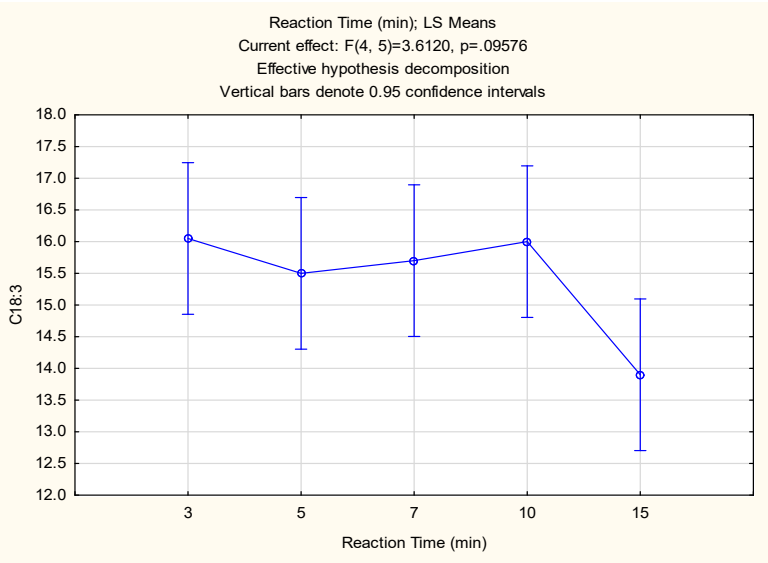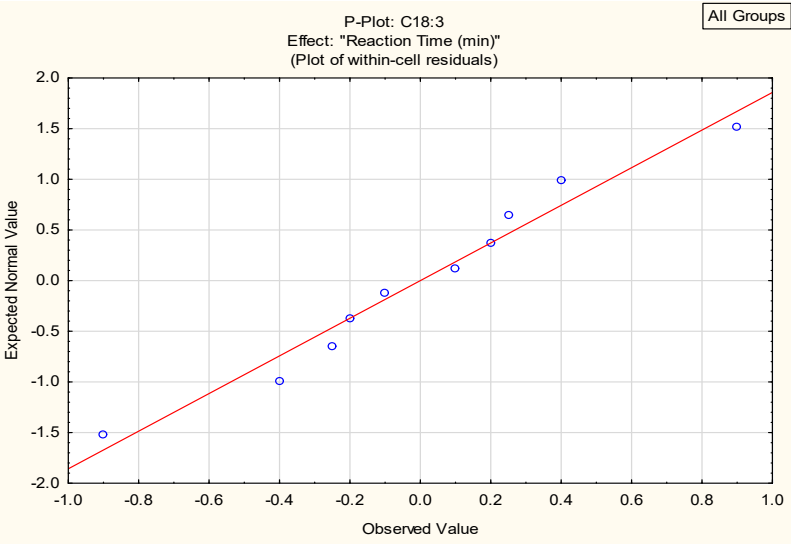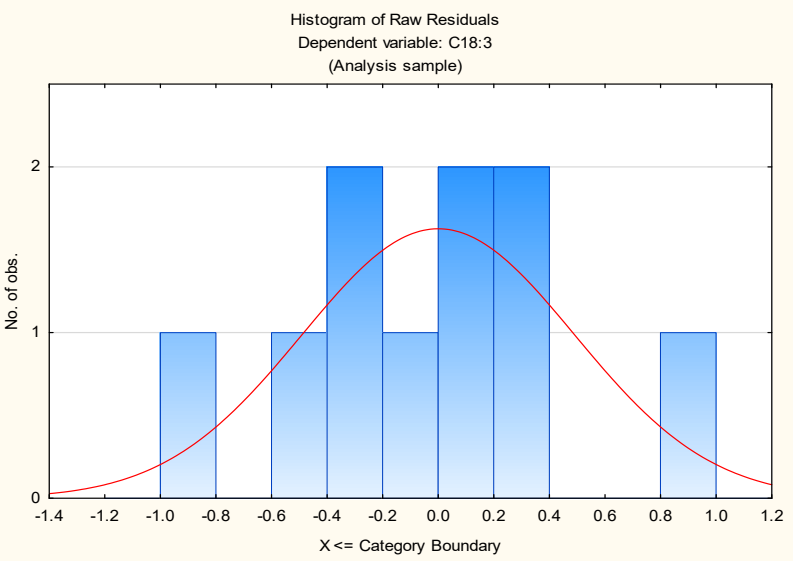

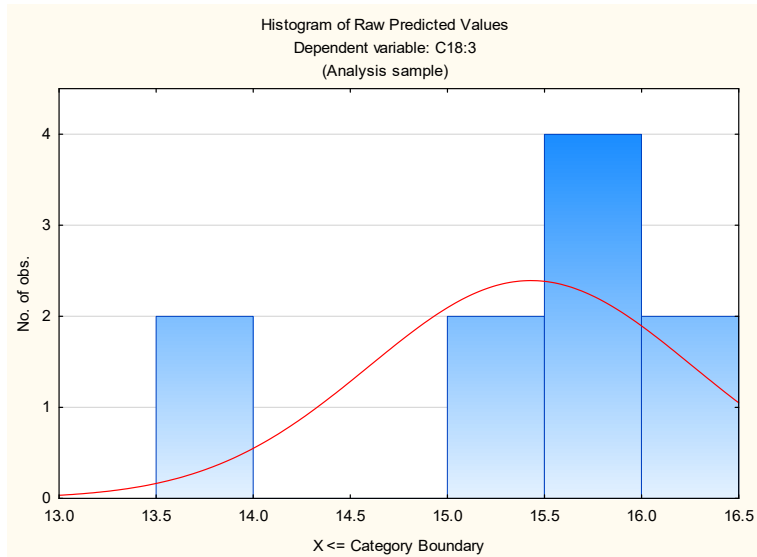

## Effect of Rotational Speed

| Univariate Tests of Significance for Biodiesel Conversion (%) (Rotational Speed) |          |                  |          |          |          |
|----------------------------------------------------------------------------------|----------|------------------|----------|----------|----------|
| Sigma-restricted parameterization                                                |          |                  |          |          |          |
| Effective hypothesis decomposition                                               |          |                  |          |          |          |
| Effect                                                                           | SS       | Degr. of Freedom | MS       | F        | p        |
| Intercept                                                                        | 88860.39 | 1                | 88860.39 | 209761.9 | 0.000000 |
| Rotational Speed (rpm)                                                           | 2616.25  | 5                | 523.25   | 1235.2   | 0.000000 |
| Error                                                                            | 2.54     | 6                | 0.42     |          |          |

| Tukey HSD test; variable Biodiesel Conversion (%) (Rotational Speed) |                        |               |               |               |               |               |               |
|----------------------------------------------------------------------|------------------------|---------------|---------------|---------------|---------------|---------------|---------------|
| Approximate Probabilities for Post Hoc Tests                         |                        |               |               |               |               |               |               |
| Error: Between MS = .42362, df = 6.0000                              |                        |               |               |               |               |               |               |
| Cell No.                                                             | Rotational Speed (rpm) | {1}<br>62.795 | {2}<br>67.775 | {3}<br>97.500 | {4}<br>96.560 | {5}<br>95.895 | {6}<br>95.790 |
| 1                                                                    | 3000                   |               | 0.002155      | 0.000249      | 0.000249      | 0.000249      | 0.000249      |
| 2                                                                    | 4000                   | 0.002155      |               | 0.000249      | 0.000249      | 0.000249      | 0.000249      |
| 3                                                                    | 5000                   | 0.000249      | 0.000249      |               | 0.705821      | 0.265939      | 0.222497      |
| 4                                                                    | 6000                   | 0.000249      | 0.000249      | 0.705821      |               | 0.894937      | 0.830979      |
| 5                                                                    | 7000                   | 0.000249      | 0.000249      | 0.265939      | 0.894937      |               | 0.999975      |
| 6                                                                    | 8000                   | 0.000249      | 0.000249      | 0.222497      | 0.830979      | 0.999975      |               |

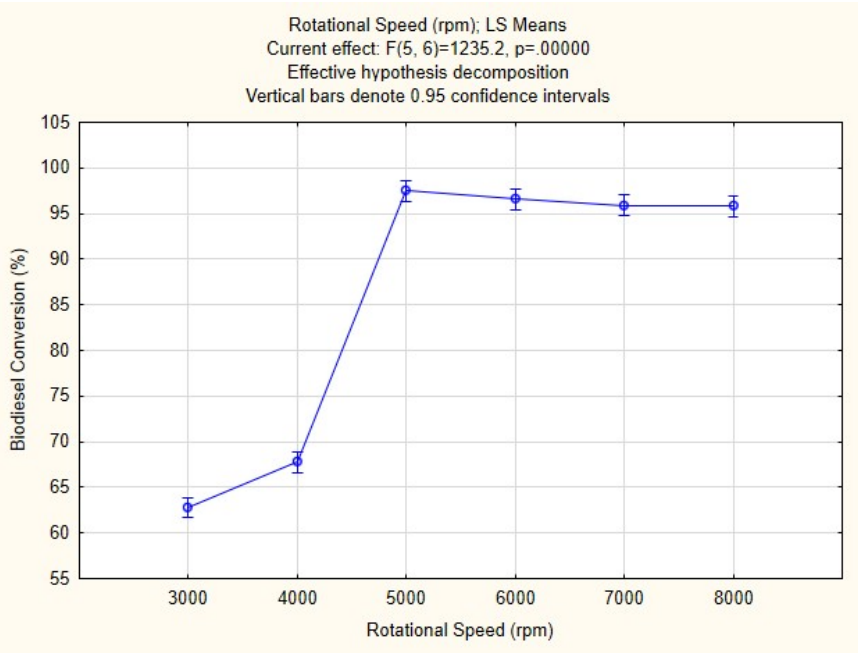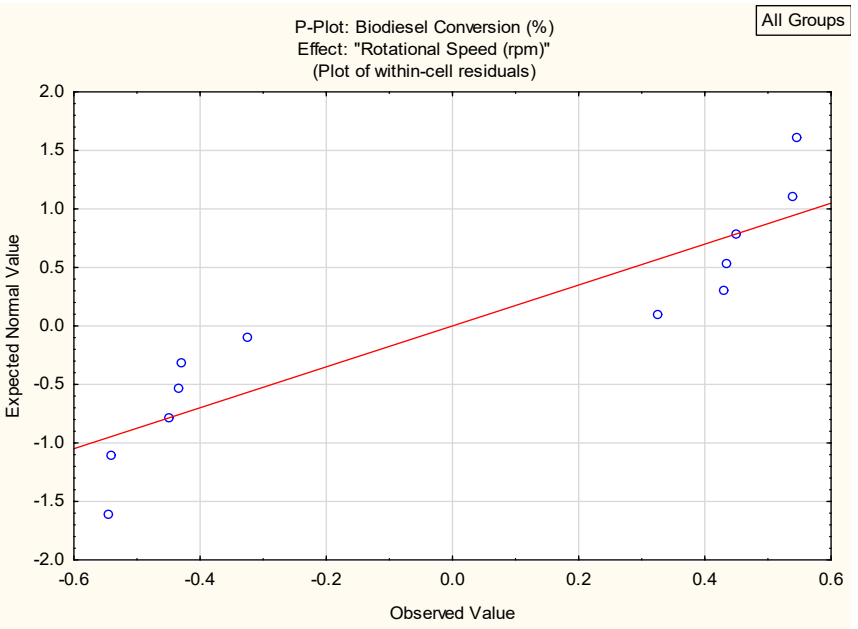

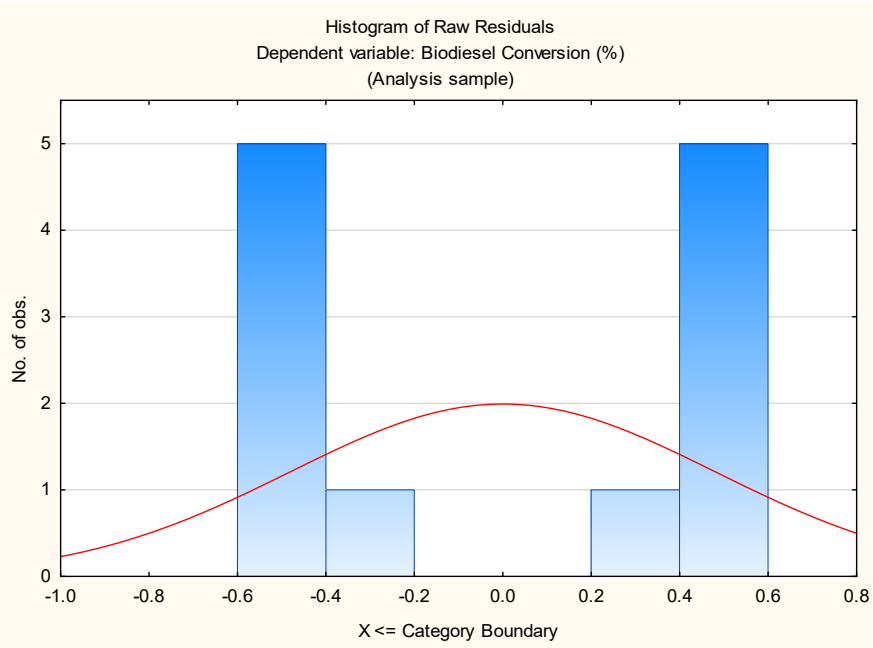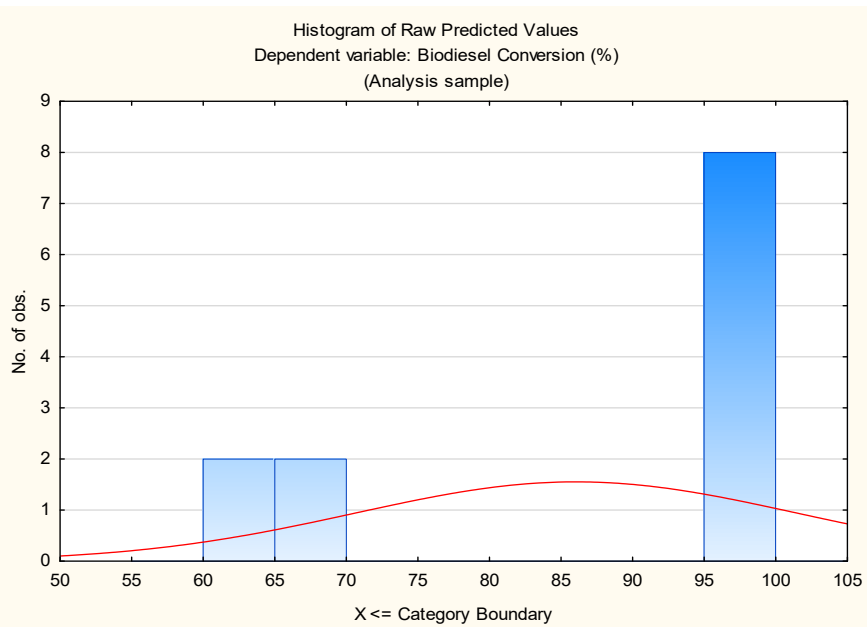

| Univariate Tests of Significance for C16:0 (Rotational Speed) |          |                  |          |          |          |
|---------------------------------------------------------------|----------|------------------|----------|----------|----------|
| Sigma-restricted parameterization                             |          |                  |          |          |          |
| Effective hypothesis decomposition                            |          |                  |          |          |          |
| Effect                                                        | SS       | Degr. of Freedom | MS       | F        | p        |
| Intercept                                                     | 920.5008 | 1                | 920.5008 | 10724.28 | 0.000000 |
| Rotational Speed (rpm)                                        | 0.6742   | 5                | 0.1348   | 1.57     | 0.297421 |
| Error                                                         | 0.5150   | 6                | 0.0858   |          |          |

| Tukey HSD test; variable C16:0 (Rotational Speed) |                        |          |          |          |          |          |          |
|---------------------------------------------------|------------------------|----------|----------|----------|----------|----------|----------|
| Approximate Probabilities for Post Hoc Tests      |                        |          |          |          |          |          |          |
| Error: Between MS = .08583, df = 6.0000           |                        |          |          |          |          |          |          |
| Cell No.                                          | Rotational Speed (rpm) | {1}      | {2}      | {3}      | {4}      | {5}      | {6}      |
| 1                                                 | 3000                   | 8.9000   | 8.5000   | 8.9500   | 8.7500   | 8.4000   | 9.0500   |
| 2                                                 | 4000                   | 0.745445 | 0.745445 | 0.999968 | 0.993629 | 0.572215 | 0.993629 |
| 3                                                 | 5000                   | 0.999968 | 0.658935 |          | 0.977614 | 0.489521 | 0.999047 |
| 4                                                 | 6000                   | 0.993629 | 0.945272 | 0.977614 |          | 0.825885 | 0.894138 |
| 5                                                 | 7000                   | 0.572215 | 0.999047 | 0.489521 | 0.825885 |          | 0.347072 |
| 6                                                 | 8000                   | 0.993629 | 0.489521 | 0.999047 | 0.894138 | 0.347072 |          |

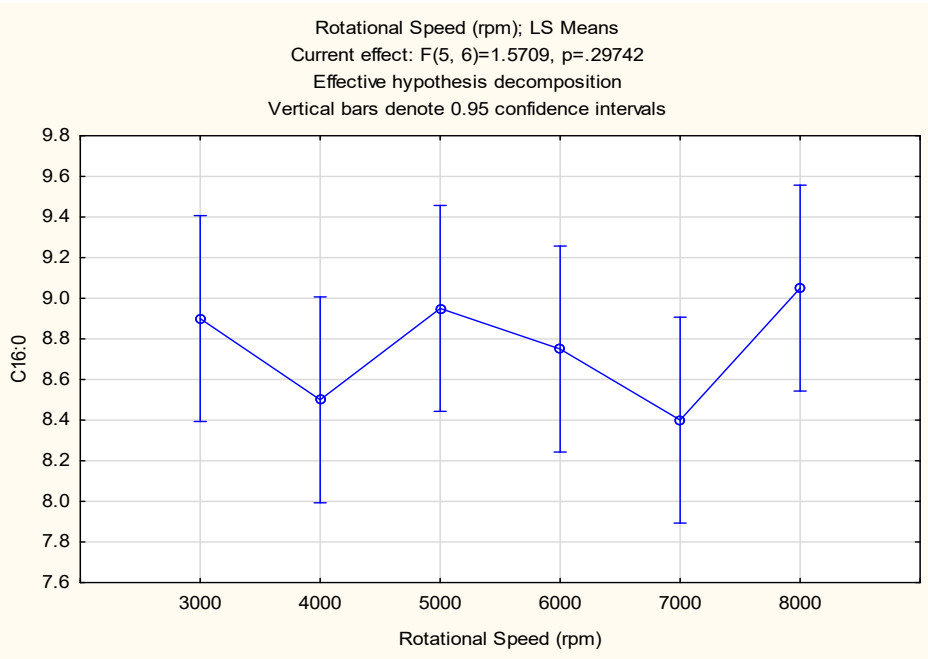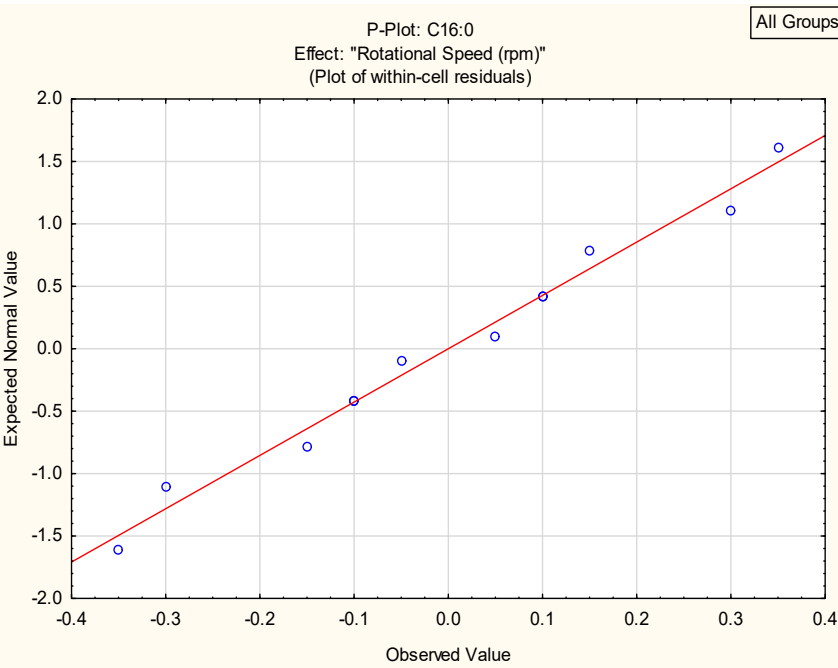

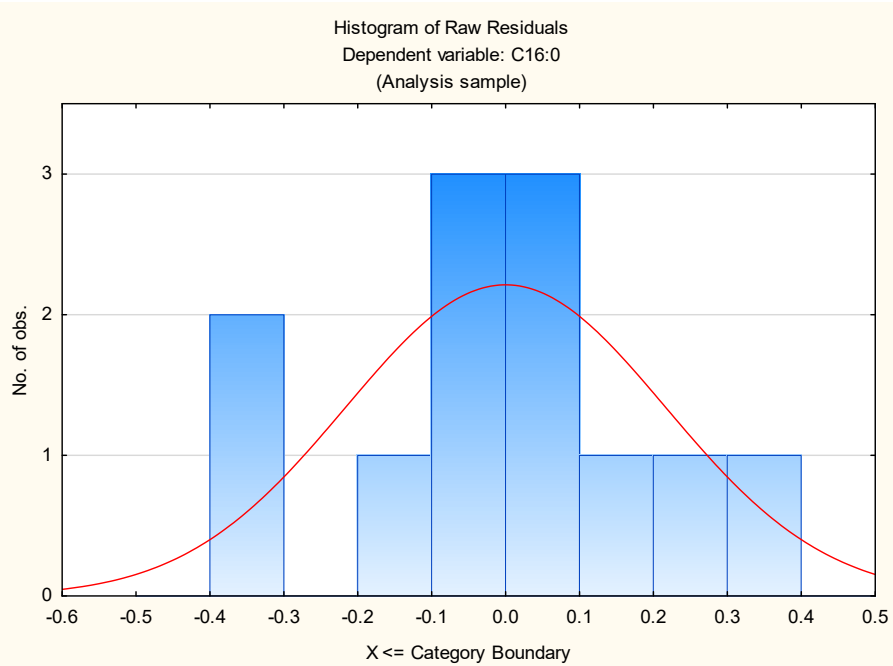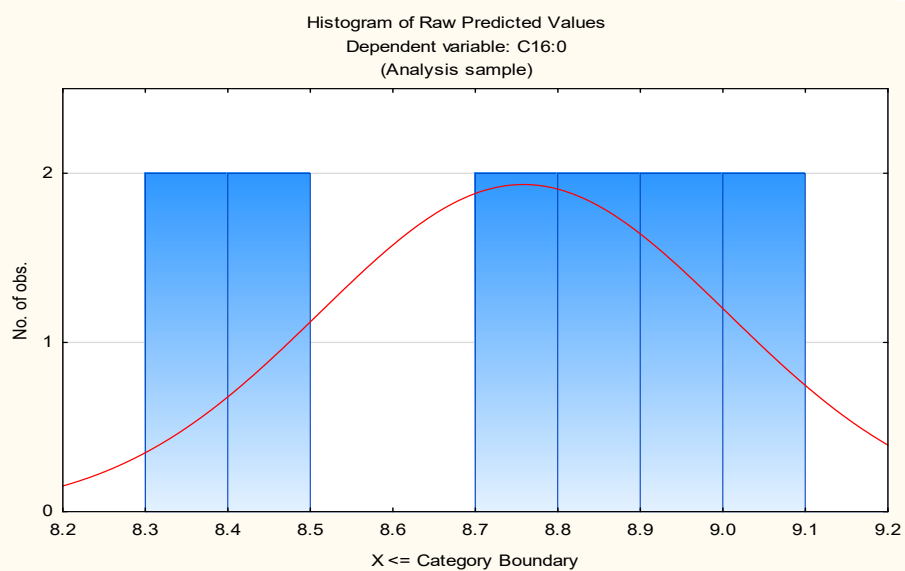

| Univariate Tests of Significance for C18:0 (Rotational Speed) |          |                  |          |          |          |
|---------------------------------------------------------------|----------|------------------|----------|----------|----------|
| Sigma-restricted parameterization                             |          |                  |          |          |          |
| Effective hypothesis decomposition                            |          |                  |          |          |          |
| Effect                                                        | SS       | Degr. of Freedom | MS       | F        | p        |
| Intercept                                                     | 705.3333 | 1                | 705.3333 | 2418.286 | 0.000000 |
| Rotational Speed (rpm)                                        | 2.9767   | 5                | 0.5953   | 2.041    | 0.205208 |
| Error                                                         | 1.7500   | 6                | 0.2917   |          |          |

| Tukey HSD test; variable C18:0 (Rotational Speed) |                        |          |          |          |          |          |          |
|---------------------------------------------------|------------------------|----------|----------|----------|----------|----------|----------|
| Approximate Probabilities for Post Hoc Tests      |                        |          |          |          |          |          |          |
| Error: Between MS = .29167, df = 6.0000           |                        |          |          |          |          |          |          |
| Cell No.                                          | Rotational Speed (rpm) | {1}      | {2}      | {3}      | {4}      | {5}      | {6}      |
|                                                   |                        | 7.0000   | 7.3000   | 7.5500   | 7.5500   | 8.5000   | 8.1000   |
| 1                                                 | 3000                   |          | 0.990809 | 0.896100 | 0.896100 | 0.188167 | 0.418749 |
| 2                                                 | 4000                   | 0.990809 |          | 0.995984 | 0.995984 | 0.345850 | 0.686927 |
| 3                                                 | 5000                   | 0.896100 | 0.995984 |          | 1.000000 | 0.546264 | 0.896100 |
| 4                                                 | 6000                   | 0.896100 | 0.995984 | 1.000000 |          | 0.546264 | 0.896100 |
| 5                                                 | 7000                   | 0.188167 | 0.345850 | 0.546264 | 0.546264 |          | 0.968674 |
| 6                                                 | 8000                   | 0.418749 | 0.686927 | 0.896100 | 0.896100 | 0.968674 |          |

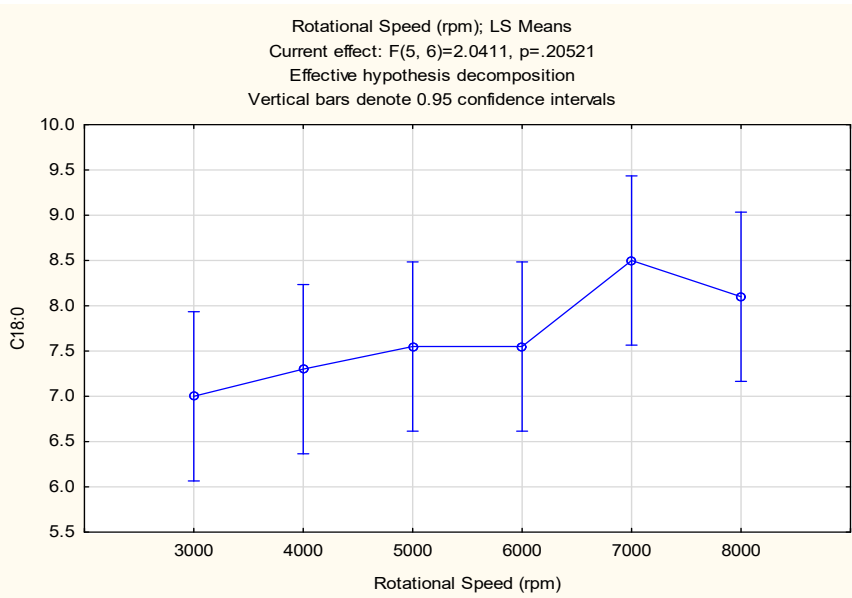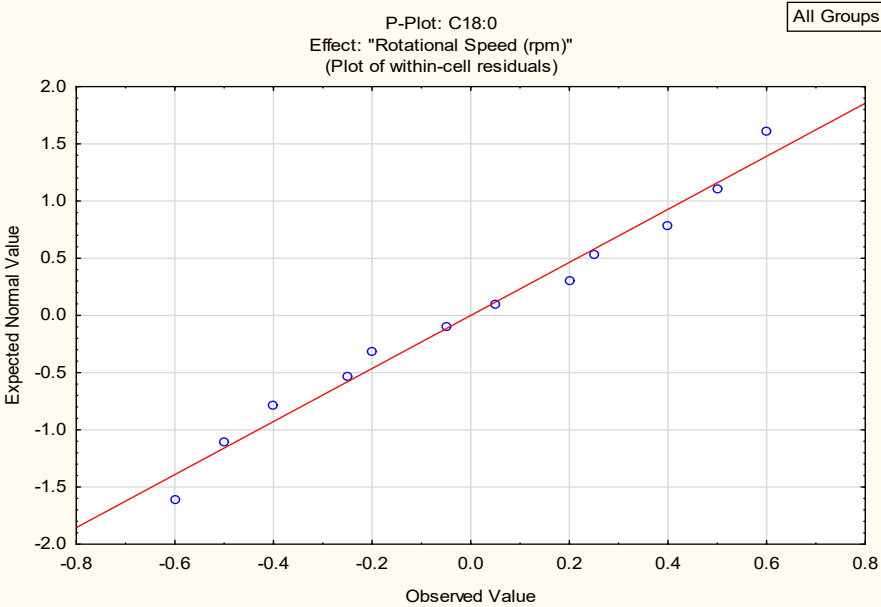



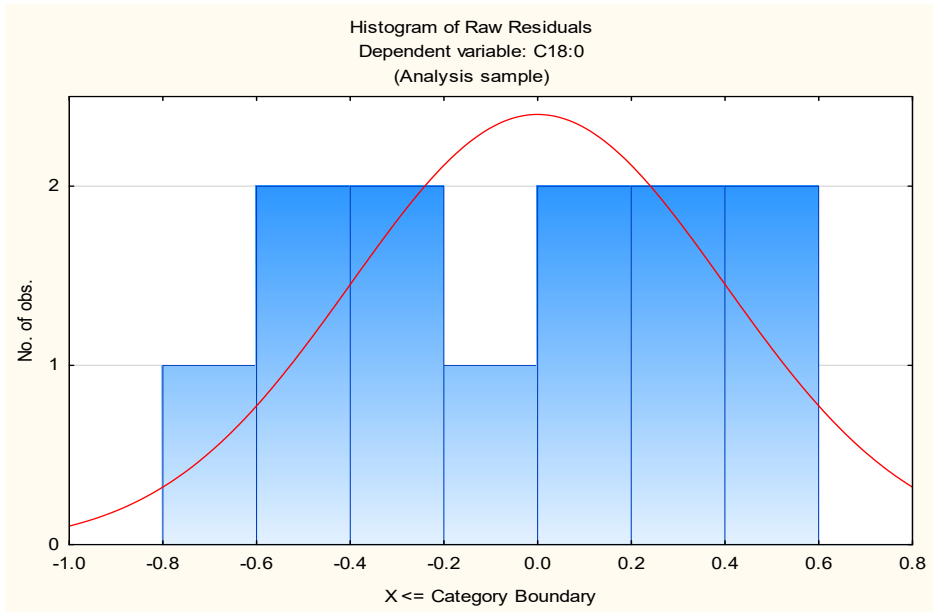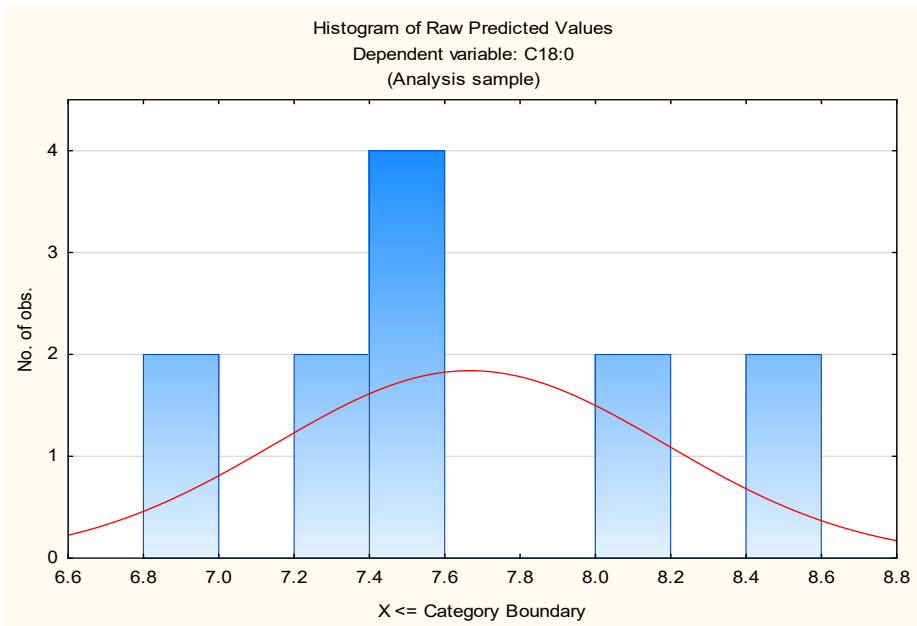

| Univariate Tests of Significance for C18:1 (Rotational Speed) |          |                  |          |          |          |
|---------------------------------------------------------------|----------|------------------|----------|----------|----------|
| Sigma-restricted parameterization                             |          |                  |          |          |          |
| Effective hypothesis decomposition                            |          |                  |          |          |          |
| Effect                                                        | SS       | Degr. of Freedom | MS       | F        | p        |
| Intercept                                                     | 9207.480 | 1                | 9207.480 | 10727.16 | 0.000000 |
| Rotational Speed (rpm)                                        | 32.370   | 5                | 6.474    | 7.54     | 0.014424 |
| Error                                                         | 5.150    | 6                | 0.858    |          |          |

| Tukey HSD test; variable C18:1 (Rotational Speed) |                        |               |               |               |               |               |               |
|---------------------------------------------------|------------------------|---------------|---------------|---------------|---------------|---------------|---------------|
| Approximate Probabilities for Post Hoc Tests      |                        |               |               |               |               |               |               |
| Error: Between MS = .85833, df = 6.0000           |                        |               |               |               |               |               |               |
| Cell No.                                          | Rotational Speed (rpm) | {1}<br>26.900 | {2}<br>26.800 | {3}<br>28.900 | {4}<br>24.950 | {5}<br>29.800 | {6}<br>28.850 |
| 1                                                 | 3000                   |               | 0.999997      | 0.369529      | 0.390818      | 0.126724      | 0.390818      |
| 2                                                 | 4000                   | 0.999997      |               | 0.329844      | 0.435809      | 0.112335      | 0.349241      |
| 3                                                 | 5000                   | 0.369529      | 0.329844      |               | 0.037253      | 0.911860      | 1.000000      |
| 4                                                 | 6000                   | 0.390818      | 0.435809      | 0.037253      |               | 0.014482      | 0.039381      |
| 5                                                 | 7000                   | 0.126724      | 0.112335      | 0.911860      | 0.014482      |               | 0.893635      |
| 6                                                 | 8000                   | 0.390818      | 0.349241      | 1.000000      | 0.039381      | 0.893635      |               |

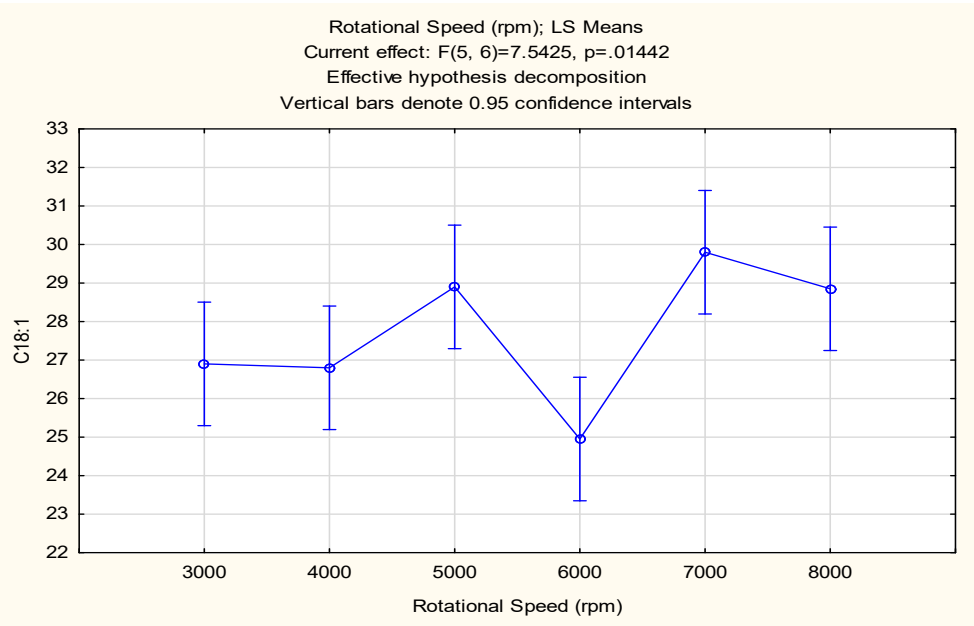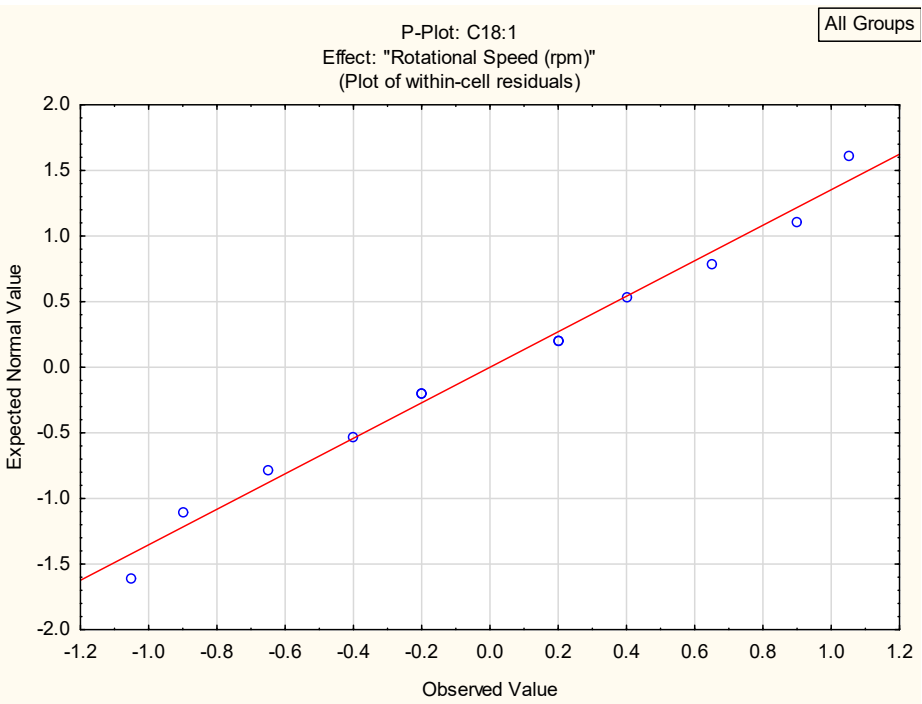

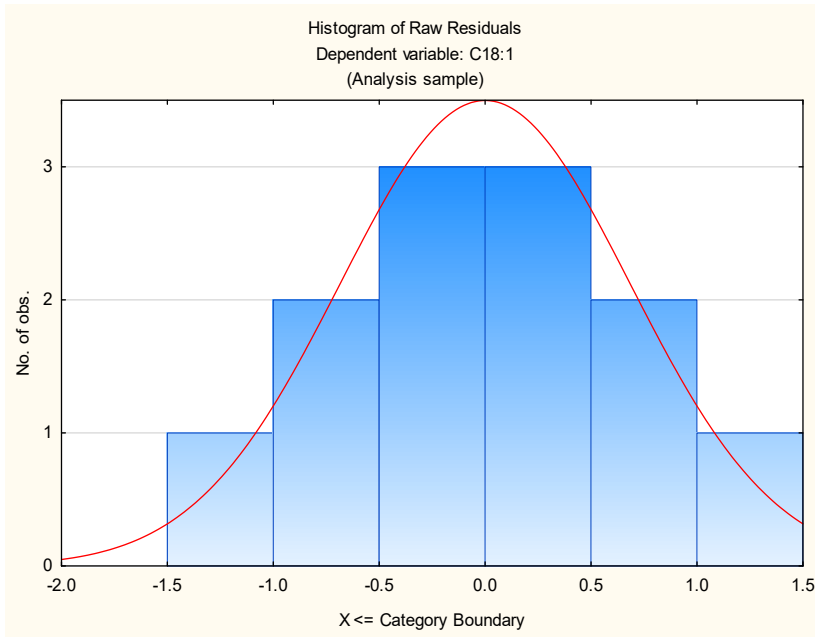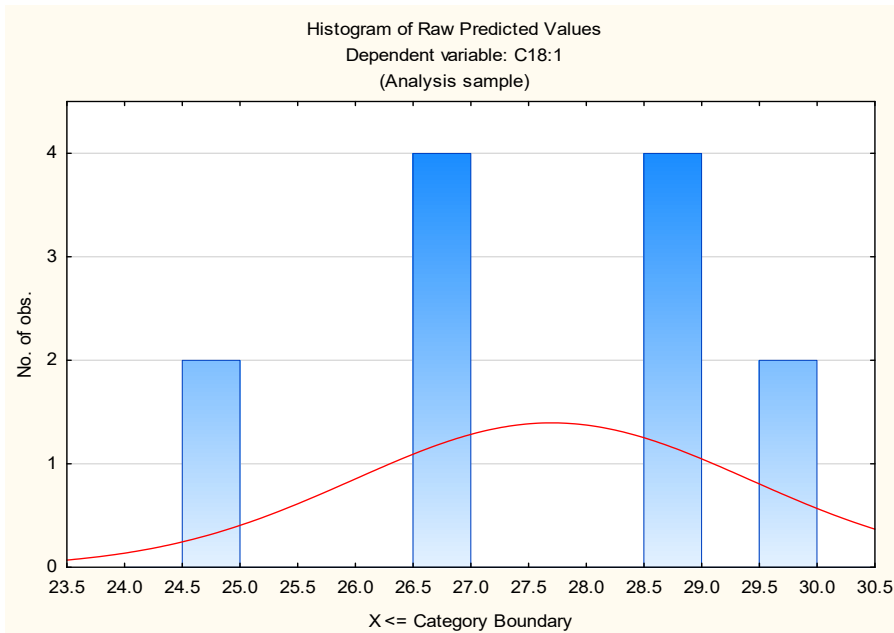

| Univariate Tests of Significance for C18:2 (Rotational Speed) |          |                  |          |          |          |
|---------------------------------------------------------------|----------|------------------|----------|----------|----------|
| Sigma-restricted parameterization                             |          |                  |          |          |          |
| Effective hypothesis decomposition                            |          |                  |          |          |          |
| Effect                                                        | SS       | Degr. of Freedom | MS       | F        | p        |
| Intercept                                                     | 16905.01 | 1                | 16905.01 | 4307.010 | 0.000000 |
| Rotational Speed (rpm)                                        | 73.22    | 5                | 14.64    | 3.731    | 0.070002 |
| Error                                                         | 23.55    | 6                | 3.93     |          |          |

| Tukey HSD test; variable C18:2 (Rotational Speed) |                        |          |          |          |          |          |          |
|---------------------------------------------------|------------------------|----------|----------|----------|----------|----------|----------|
| Approximate Probabilities for Post Hoc Tests      |                        |          |          |          |          |          |          |
| Error: Between MS = 3.9250, df = 6.0000           |                        |          |          |          |          |          |          |
| Cell No.                                          | Rotational Speed (rpm) | {1}      | {2}      | {3}      | {4}      | {5}      | {6}      |
|                                                   |                        | 38.150   | 40.800   | 38.000   | 39.400   | 33.300   | 35.550   |
| 1                                                 | 3000                   |          | 0.759082 | 0.999999 | 0.983977 | 0.271199 | 0.771341 |
| 2                                                 | 4000                   | 0.759082 |          | 0.721455 | 0.974159 | 0.061602 | 0.216954 |
| 3                                                 | 5000                   | 0.999999 | 0.721455 |          | 0.974159 | 0.294478 | 0.806988 |
| 4                                                 | 6000                   | 0.983977 | 0.974159 | 0.974159 |          | 0.134194 | 0.459381 |
| 5                                                 | 7000                   | 0.271199 | 0.061602 | 0.294478 | 0.134194 |          | 0.851126 |
| 6                                                 | 8000                   | 0.771341 | 0.216954 | 0.806988 | 0.459381 | 0.851126 |          |

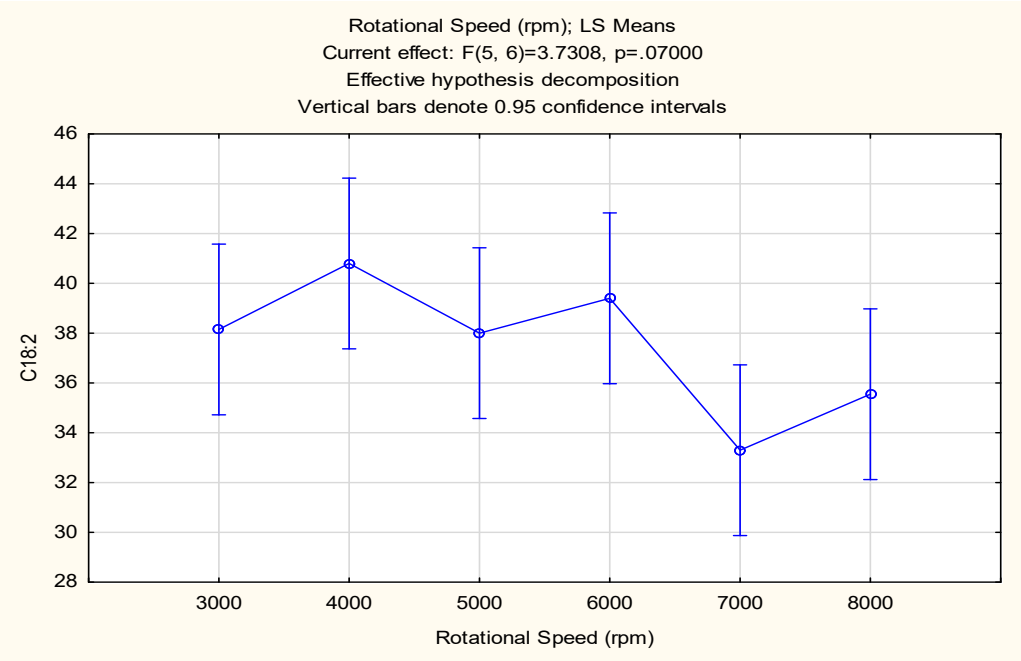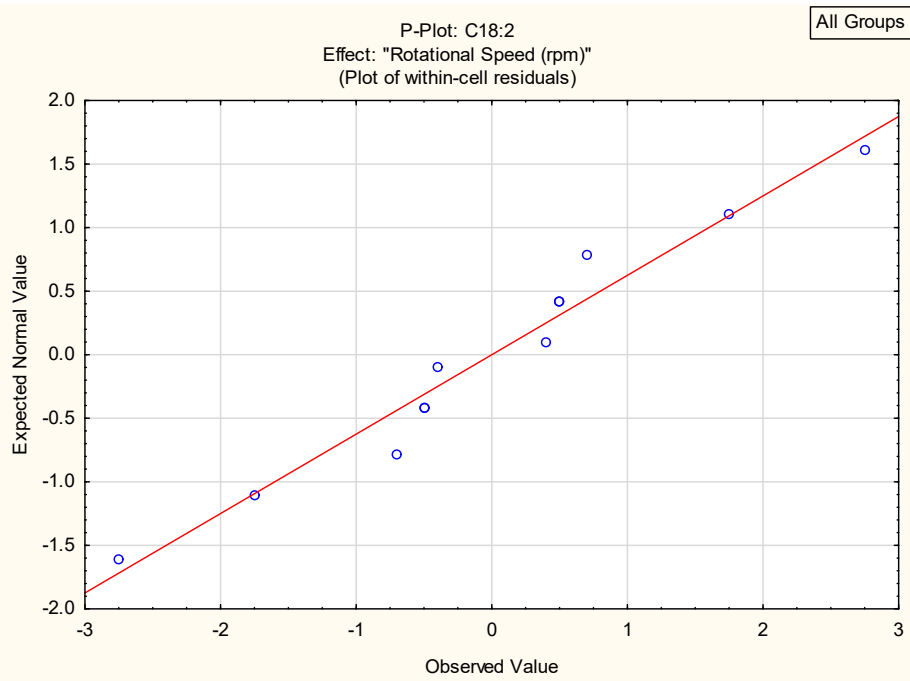

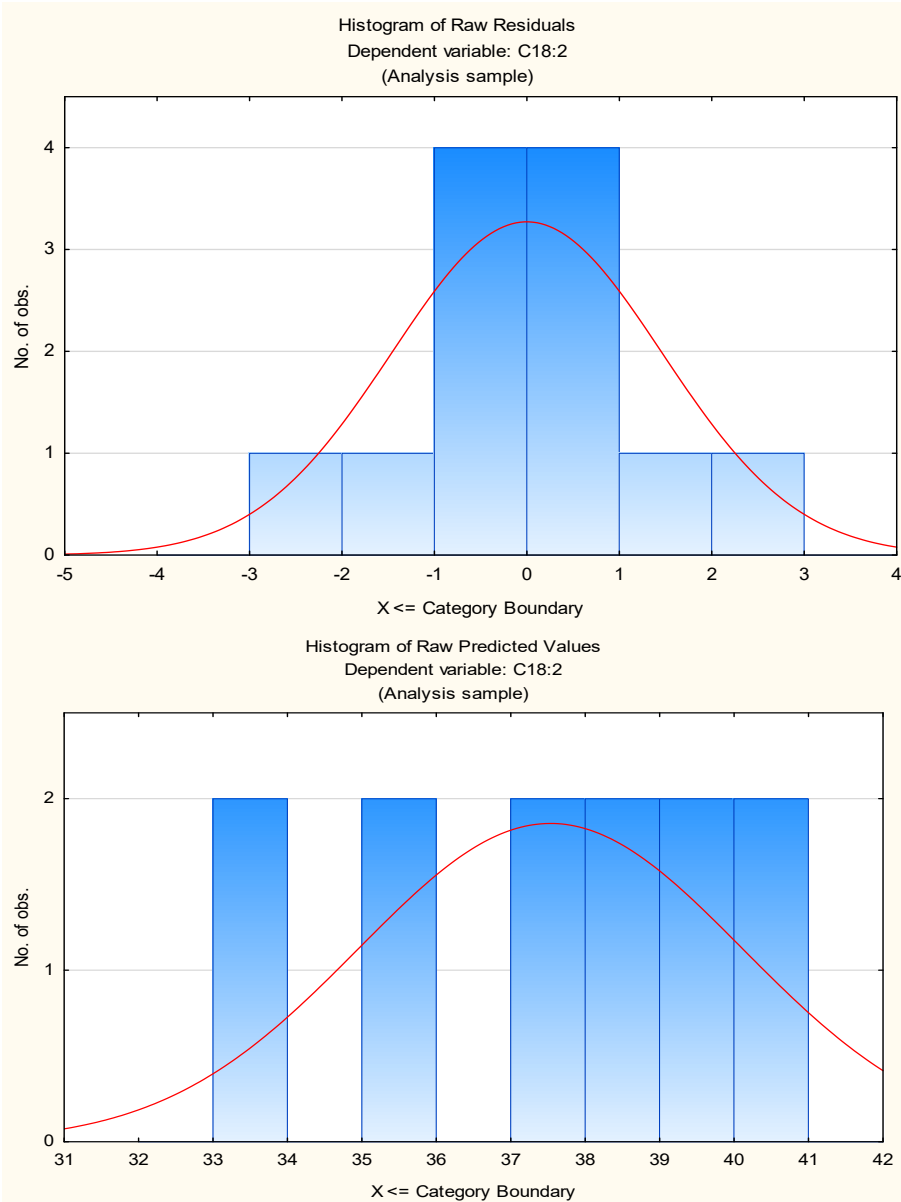

| Univariate Tests of Significance for C18:3 (Rotational Speed)<br>Sigma-restricted parameterization<br>Effective hypothesis decomposition |          |                  |          |          |          |
|------------------------------------------------------------------------------------------------------------------------------------------|----------|------------------|----------|----------|----------|
| Effect                                                                                                                                   | SS       | Degr. of Freedom | MS       | F        | p        |
| Intercept                                                                                                                                | 3444.241 | 1                | 3444.241 | 20769.29 | 0.000000 |
| Rotational Speed (rpm)                                                                                                                   | 14.574   | 5                | 2.915    | 17.58    | 0.001591 |
| Error                                                                                                                                    | 0.995    | 6                | 0.166    |          |          |

| Tukey HSD test, variable C18:3 (Rotational Speed) |                        |          |          |          |          |          |          |
|---------------------------------------------------|------------------------|----------|----------|----------|----------|----------|----------|
| Approximate Probabilities for Post Hoc Tests      |                        |          |          |          |          |          |          |
| Error: Between MS = .16583, df = 6.0000           |                        |          |          |          |          |          |          |
| Cell No.                                          | Rotational Speed (rpm) | {1}      | {2}      | {3}      | {4}      | {5}      | {6}      |
| 1                                                 | 3000                   |          |          |          |          |          |          |
| 2                                                 | 4000                   | 0.007304 | 0.007304 | 0.004472 | 0.118222 | 0.999994 | 0.011140 |
| 3                                                 | 5000                   | 0.004472 | 0.985756 |          | 0.089995 | 0.004917 | 0.863595 |
| 4                                                 | 6000                   | 0.118222 | 0.178615 | 0.089995 |          | 0.135623 | 0.307301 |
| 5                                                 | 7000                   | 0.999994 | 0.008097 | 0.004917 | 0.135623 |          | 0.012433 |
| 6                                                 | 8000                   | 0.011140 | 0.994728 | 0.863595 | 0.307301 | 0.012433 |          |

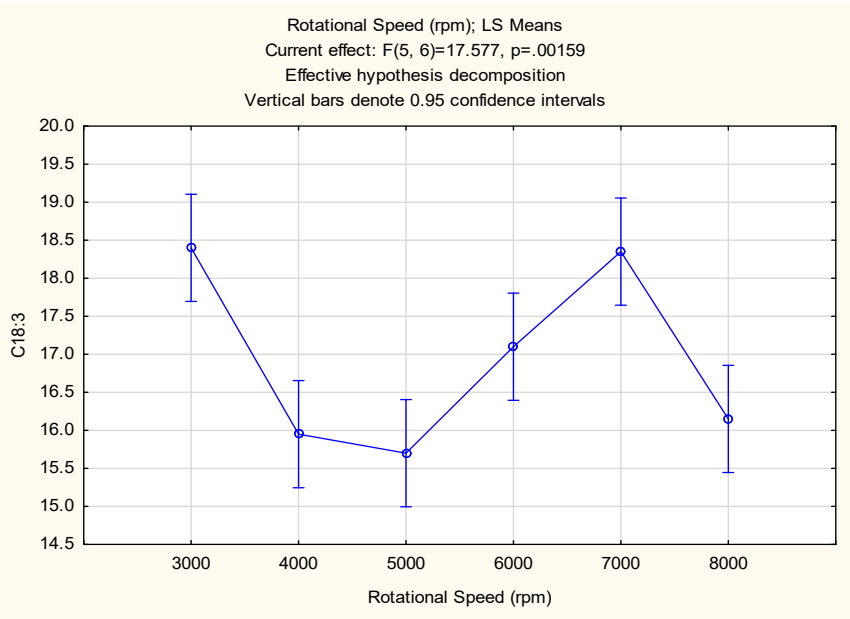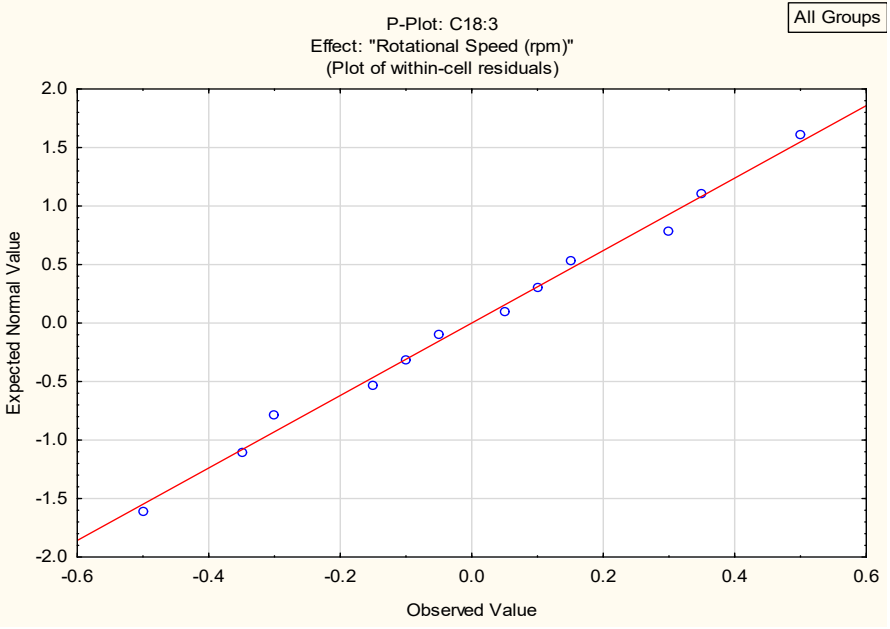

Histogram of Raw Residuals  
Dependent variable: C18:3  
(Analysis sample)

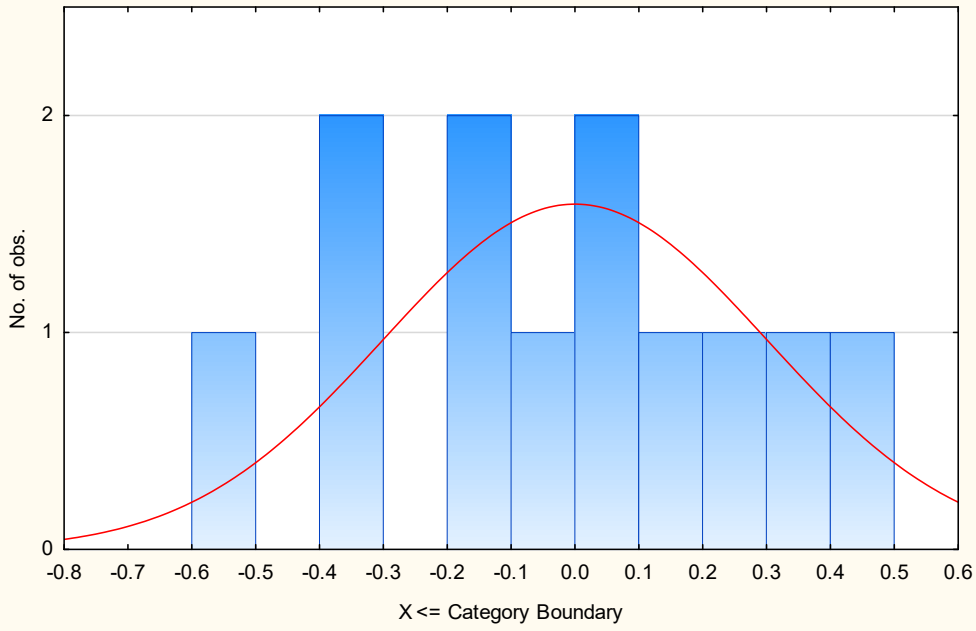

Histogram of Raw Predicted Values  
Dependent variable: C18:3  
(Analysis sample)

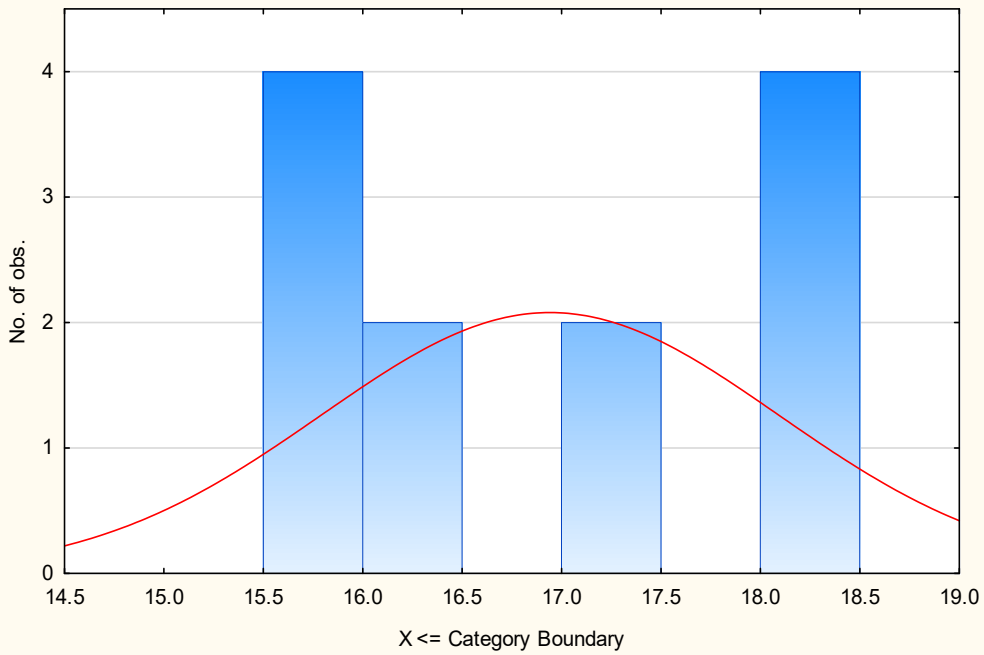

**Table 2.** ANOVA and Tukey post hoc test for cetane number of the CCD-assisted DT rubber seed. Significance values below  $\alpha < 0.05$  are colour coded in red.

| Univariate Tests of Significance for Cetane Number (CN - Ratio)<br>Sigma-restricted parameterization<br>Effective hypothesis decomposition |          |                  |          |          |          |
|--------------------------------------------------------------------------------------------------------------------------------------------|----------|------------------|----------|----------|----------|
| Effect                                                                                                                                     | SS       | Degr. of Freedom | MS       | F        | p        |
| Intercept                                                                                                                                  | 34645.00 | 1                | 34645.00 | 8056.976 | 0.000000 |
| Ratio Seed : Methanol                                                                                                                      | 98.12    | 4                | 24.53    | 5.705    | 0.041778 |
| Error                                                                                                                                      | 21.50    | 5                | 4.30     |          |          |

| Tukey HSD test; variable Cetane Number (CN - Ratio)<br>Approximate Probabilities for Post Hoc Tests<br>Error: Between MS = 4.3000, df = 5.0000 |                       |          |          |          |          |          |
|------------------------------------------------------------------------------------------------------------------------------------------------|-----------------------|----------|----------|----------|----------|----------|
| Cell No.                                                                                                                                       | Ratio Seed : Methanol | {1}      | {2}      | {3}      | {4}      | {5}      |
| 1                                                                                                                                              | 1:2                   | 57.350   | 0.953852 | 0.942061 | 0.072980 | 1.000000 |
| 2                                                                                                                                              | 1:3                   | 0.953852 |          | 0.653769 | 0.038767 | 0.959164 |
| 3                                                                                                                                              | 1:1                   | 0.942061 | 0.653769 |          | 0.151287 | 0.935570 |
| 4                                                                                                                                              | 1:4                   | 0.072980 | 0.038767 | 0.151287 |          | 0.071289 |
| 5                                                                                                                                              | 1:5                   | 1.000000 | 0.959164 | 0.935570 | 0.071289 |          |

| Univariate Tests of Significance for Cetane Number (Spreadsheet14)<br>Sigma-restricted parameterization<br>Effective hypothesis decomposition |          |                  |          |          |          |
|-----------------------------------------------------------------------------------------------------------------------------------------------|----------|------------------|----------|----------|----------|
| Effect                                                                                                                                        | SS       | Degr. of Freedom | MS       | F        | p        |
| Intercept                                                                                                                                     | 25821.28 | 1                | 25821.28 | 1516.780 | 0.000003 |
| Catalyst Concentration (wt./v,%)                                                                                                              | 39.67    | 3                | 13.22    | 0.777    | 0.564931 |
| Error                                                                                                                                         | 68.10    | 4                | 17.02    |          |          |

| Tukey HSD test; variable Cetane Number (Spreadsheet14)<br>Approximate Probabilities for Post Hoc Tests<br>Error: Between MS = 17.024, df = 4.0000 |                                  |          |          |          |          |
|---------------------------------------------------------------------------------------------------------------------------------------------------|----------------------------------|----------|----------|----------|----------|
| Cell No.                                                                                                                                          | Catalyst Concentration (wt./v,%) | {1}      | {2}      | {3}      | {4}      |
| 1                                                                                                                                                 | 1                                | 56.300   | 0.846728 | 0.983145 | 0.904667 |
| 2                                                                                                                                                 | 3                                | 0.846728 |          | 0.964020 | 0.523041 |
| 3                                                                                                                                                 | 5                                | 0.983145 | 0.964020 |          | 0.749775 |
| 4                                                                                                                                                 | 7                                | 0.904667 | 0.523041 | 0.749775 |          |

| Univariate Tests of Significance for Cetane Number (Spreadsheet39)<br>Sigma-restricted parameterization<br>Effective hypothesis decomposition |          |                  |          |          |          |
|-----------------------------------------------------------------------------------------------------------------------------------------------|----------|------------------|----------|----------|----------|
| Effect                                                                                                                                        | SS       | Degr. of Freedom | MS       | F        | p        |
| Intercept                                                                                                                                     | 39350.53 | 1                | 39350.53 | 2629.504 | 0.000000 |
| Reaction Time (min)                                                                                                                           | 463.68   | 4                | 115.92   | 7.746    | 0.022689 |
| Error                                                                                                                                         | 74.82    | 5                | 14.96    |          |          |



| Tukey HSD test; variable Cetane Number (Spreadsheet39)<br>Approximate Probabilities for Post Hoc Tests<br>Error: Between MS = 14.965, df = 5.0000 |                     |          |          |          |          |          |
|---------------------------------------------------------------------------------------------------------------------------------------------------|---------------------|----------|----------|----------|----------|----------|
| Cell No.                                                                                                                                          | Reaction Time (min) | {1}      | {2}      | {3}      | {4}      | {5}      |
|                                                                                                                                                   |                     | 58.300   | 74.850   | 55.700   | 65.200   | 59.600   |
| 1                                                                                                                                                 | 3                   |          | 0.039250 | 0.954542 | 0.468595 | 0.996357 |
| 2                                                                                                                                                 | 5                   | 0.039250 |          | 0.021974 | 0.229100 | 0.053463 |
| 3                                                                                                                                                 | 7                   | 0.954542 | 0.021974 |          | 0.238578 | 0.842350 |
| 4                                                                                                                                                 | 10                  | 0.468595 | 0.229100 | 0.238578 |          | 0.628969 |
| 5                                                                                                                                                 | 15                  | 0.996357 | 0.053463 | 0.842350 | 0.628969 |          |

| Univariate Tests of Significance for Cetane Number (Spreadsheet52)<br>Sigma-restricted parameterization<br>Effective hypothesis decomposition |          |                  |          |          |          |
|-----------------------------------------------------------------------------------------------------------------------------------------------|----------|------------------|----------|----------|----------|
| Effect                                                                                                                                        | SS       | Degr. of Freedom | MS       | F        | p        |
| Intercept                                                                                                                                     | 39560.08 | 1                | 39560.08 | 10610.66 | 0.000000 |
| Rotational Speed (rpm)                                                                                                                        | 77.35    | 5                | 15.47    | 4.15     | 0.056259 |
| Error                                                                                                                                         | 22.37    | 6                | 3.73     |          |          |

| Tukey HSD test; variable Cetane Number (Spreadsheet52)<br>Approximate Probabilities for Post Hoc Tests<br>Error: Between MS = 3.7283, df = 6.0000 |                        |          |          |          |          |          |          |
|---------------------------------------------------------------------------------------------------------------------------------------------------|------------------------|----------|----------|----------|----------|----------|----------|
| Cell No.                                                                                                                                          | Rotational Speed (rpm) | {1}      | {2}      | {3}      | {4}      | {5}      | {6}      |
|                                                                                                                                                   |                        | 60.350   | 61.050   | 55.700   | 53.800   | 57.000   | 56.600   |
| 1                                                                                                                                                 | 3000                   |          | 0.998731 | 0.283238 | 0.094652 | 0.558141 | 0.459916 |
| 2                                                                                                                                                 | 4000                   | 0.998731 |          | 0.189586 | 0.063685 | 0.393751 | 0.316750 |
| 3                                                                                                                                                 | 5000                   | 0.283238 | 0.189586 |          | 0.907778 | 0.978875 | 0.995855 |
| 4                                                                                                                                                 | 6000                   | 0.094652 | 0.063685 | 0.907778 |          | 0.597032 | 0.702830 |
| 5                                                                                                                                                 | 7000                   | 0.558141 | 0.393751 | 0.978875 | 0.597032 |          | 0.999916 |
| 6                                                                                                                                                 | 8000                   | 0.459916 | 0.316750 | 0.995855 | 0.702830 | 0.999916 |          |
